# Supplementary material for: Rectal water contrast transvaginal ultrasound versus double-contrast barium enema in the diagnosis of bowel endometriosis
Source: PubMed Central journal article supplement — BMJ Open. 2017 Sep 7;7(9):e017216. doi: 10.1136/bmjopen-2017-017216 (PMC5595180; doi:10.1136/bmjopen-2017-017216), 2017-09-07

# BMJ Open

## Comparison of rectal water contrast transvaginal ultrasound and double-contrast barium enema in assessing the presence and extent of bowel endometriosis

|                                 |                                                                                                                                                                                                                                                                                                                                                                   |
|---------------------------------|-------------------------------------------------------------------------------------------------------------------------------------------------------------------------------------------------------------------------------------------------------------------------------------------------------------------------------------------------------------------|
| Journal:                        | <i>BMJ Open</i>                                                                                                                                                                                                                                                                                                                                                   |
| Manuscript ID                   | bmjopen-2017-017216                                                                                                                                                                                                                                                                                                                                               |
| Article Type:                   | Research                                                                                                                                                                                                                                                                                                                                                          |
| Date Submitted by the Author:   | 07-Apr-2017                                                                                                                                                                                                                                                                                                                                                       |
| Complete List of Authors:       | Jiang, Jipeng; Tianjin First Center Hospital, Department of Ultrasound<br>Liu, Ying; Tianjin First Center Hospital, Department of Ultrasound<br>Wang, Kun; Tianjin First Center Hospital, Department of Ultrasound<br>Wu, Xixiang; Tianjin First Center Hospital, Department of Ultrasound<br>Tang, Ying; Tianjin First Center Hospital, Department of Ultrasound |
| <b>Primary Subject Heading</b>: | Public health                                                                                                                                                                                                                                                                                                                                                     |
| Secondary Subject Heading:      | Public health                                                                                                                                                                                                                                                                                                                                                     |
| Keywords:                       | bowel endometriosis, double-contrast barium enema, diagnosis, rectal water contrast transvaginal ultrasound                                                                                                                                                                                                                                                       |
|                                 |                                                                                                                                                                                                                                                                                                                                                                   |

SCHOLARONE™  
Manuscripts

1  
2  
3 **Original article**  
4

5  
6 **Comparison of rectal water contrast transvaginal ultrasound and double-contrast barium**  
7  
8 **enema in assessing the presence and extent of bowel endometriosis**  
9

10  
11 Running title: Comparison of RWC-TVS and DCBE  
12

13  
14  
15 Jipeng Jiang, Ying Liu, Kun Wang, Xixiang Wu, Ying Tang \*  
16

17  
18 Department of Ultrasound, Tianjin First Center Hospital, No. 24 Fukang Road, Nankai District,  
19  
20 Tianjin 300192, China  
21

22  
23  
24  
25  
26  
27 \*Corresponding author: Ying Tang, Department of Ultrasound, Tianjin First Center Hospital, No.  
28  
29 24 Fukang Road, Nankai District, Tianjin 300192, China  
30

31  
32  
33 E-mail: [dr\\_tangying@sina.com](mailto:dr_tangying@sina.com)  
34

35  
36 Tel.: +86-13702138582  
37  
38  
39  
40  
41  
42  
43  
44  
45  
46  
47  
48  
49  
50  
51  
52  
53  
54  
55  
56  
57  
58  
59  
60

## Abstract

**Objectives** This study aims to compare the accuracy between rectal water contrast transvaginal ultrasound (RWC-TVS) and double-contrast barium enema (DCBE) in evaluating the bowel endometriosis presence as well as its extent.

**Design & Setting** 198 patients at reproductive age with suspicious bowel endometriosis were included. Physicians in two groups specialized at endometriosis performed RWC-TVS as well as DCBE before laparoscopy, and both groups were blinded to other groups' results. Findings from RWC-TVS or DCBE were compared to histological results. The severity of experienced pain severity through RWC-TVS or DCBE was assessed by an analog scale of 10 cm.

**Results** In total, 110 in 198 women were confirmed to have endometriosis nodules in the bowel by laparoscopy as well as histopathology. For bowel endometriosis diagnosis, DCBE and RWC-TVS demonstrated sensitivities of 96.4% and 88.2%, specificities of 100% and 97.3%, positive prediction values of 100% and 98.0%, negative prediction values of 98.0% and 88.0%, accuracies of 98.0% and 92.4% respectively. DCBE was related to more tolerance than RWC-TVS.

**Conclusions** RWC-TVS and DCBE demonstrate similar accuracies in the bowel endometriosis diagnosis, however, patients showed more tolerance for RWC-TVS than those with DCBE.

**Keywords:** bowel endometriosis; double-contrast barium enema; diagnosis; rectal water contrast transvaginal ultrasound

1  
2  
3 **Strengths and limitations of this study**  
4

- 5  
6  
7 1. 110 in 198 women were confirmed to have endometriosis nodules in the bowel  
8  
9 2. DCBE was related to more tolerance than RWC-TVS  
10  
11 3. RWC-TVS and DCBE show similar accuracies in the bowel endometriosis diagnosis  
12  
13  
14  
15  
16  
17  
18  
19  
20  
21  
22  
23  
24  
25  
26  
27  
28  
29  
30  
31  
32  
33  
34  
35  
36  
37  
38  
39  
40  
41  
42  
43  
44  
45  
46  
47  
48  
49  
50  
51  
52  
53  
54  
55  
56  
57  
58  
59  
60

For peer review only

## Introduction

Bowel endometriosis influences 4-37% patients of endometriosis [1]. Lesions in intestinal endometriosis have variable sizes [2]. Endometriosis nodules of small sizes located in the bowel serosal surface hardly cause symptoms therefore treatments are not required [2]. Endometriosis nodules of larger sizes may infiltrate the wall of bowel and cause some gastrointestinal complaints such as diarrhea, dyschezia, constipation, intestinal cramping, and abdominal bloating [1 3]. The symptoms mimic acute bowel syndrome. The symptoms with bowel endometriosis mainly are nonspecific, usually causing misdiagnosis or diagnosis delay [4]. Physical examinations may suggest rectovaginal endometriosis presence. However, the accuracy is poor in identifying rectosigmoid nodules [5 6].

Until recently, endometriosis diagnosis ultrasound was limited to ovarian endometriosis patients. Other imaging methods were utilized for assessing bowel endometriosis, such as rectal endoscopic ultrasound, double-contrast barium enema (DCBE), transvaginal ultrasound (TVS), magnetic resonance imaging (MRI), virtual colonoscopy, and multidetector computerized tomography enema (MDCT-e) [7-10]. TVS, as a reliable and non-invasive method for assessing bowel endometriosis presence and extent [11]. Rectosigmoid nodules identification maybe facilitated by saline injection through a catheter going into the rectum through rectal-water contrast TVS (RWC-TV), assessment of infiltration depth of endometriosis on intestinal wall as well as estimation of stenosis degree in the bowel lumen. Yet, no studies have compared the accurateness between DCBE and RWC-TV in rectosigmoid endometriosis diagnosis [4 12 13].

The diagnosis of bowel endometriosis presence and extent before the surgery is necessary for making a decision on whether the operation is required as well as planning the operation procedure with colorectal surgeons [14]. Preoperational knowledge of intestinal endometriosis

1  
2  
3 nodules size, number, nodule infiltration depth on the wall of intestine, as well as bowel lumen  
4  
5 stenosis degree allows for making best decision on whether the surgery is requisite and whether  
6  
7 nodulectomy or bowel segmental resection should be chosen [15 16].  
8  
9

10 Additionally, preoperational determining of bowel endometriosis extent allows for that  
11 the surgeon informs the patient of the benefits as well as potential complications during the  
12 operation procedure to be performed. In fact, evolution or complications of the symptoms in  
13 digestive system postsurgery may be different for patients experiencing nodulectomy and  
14 segmental resection. In this study, we assessed and compared the diagnosis accuracy between  
15 DCBE and RWC-TVS for evaluating the bowel endometriosis presence and extent.  
16  
17  
18  
19  
20  
21  
22  
23  
24  
25  
26

## 27 **Materials and Methods**

### 28 **Study population**

29  
30 This study was conducted from May 2012 to Aug 2016. Patients at the reproductive ages with  
31  
32 laparoscopy scheduled for intestinal endometriosis suspicious clinical examination or symptoms  
33  
34 were recruited as participants in this study. During this period, it is required by imaging workup  
35  
36 that DCBE as well as RWC-TVS were conducted in the patients with suspicious bowel  
37  
38 endometriosis. Institutional review board of Tianjin First Center Hospital approved the protocols  
39  
40 involved in this study before initialization of the study. All patients enrolled in this study signed  
41  
42 the written consent form. Inclusion criteria of this study were: suspicious deep pelvic  
43  
44 endometriosis, at reproductive age, gastrointestinal symptoms likely being caused by the bowel  
45  
46 endometriosis, desire for complete surgical endometriosis excision. Exclusion criteria of this  
47  
48 study were: precedent bilateral ovariectomy, radiological diagnosis of bowel endometriosis,  
49  
50  
51  
52  
53  
54  
55  
56  
57  
58  
59  
60

1  
2  
3 examination of barium radiology, colorectal surgery, hepatic or renal failure, suggestive  
4  
5 intolerance for iodinated contrast medium, or refuse for DCBE or psychiatric disorders.  
6  
7

8 Symptoms were investigated systematically throughout the study and were documented  
9  
10 in a database. The existence of deep dyspareunia, dysmenorrheal, dyschezia, and non-menstrual  
11  
12 pelvic was examined and the symptom intensities were evaluated of all patients by a 10 cm  
13  
14 visual analog scale (VAS), in which left edge indicated no pain and right extremity presented  
15  
16 maximum pain. Whether the following gastrointestinal symptoms were presented was  
17  
18 determined: irritable bowel syndrome of diarrhea-predominance, passage of the stool mucus,  
19  
20 irritable bowel syndrome of constipation-predominance, abdominal bloating rectal bleeding, and  
21  
22 intestinal cramping. A questionnaire of symptom analogue scale was utilized to estimate every  
23  
24 gastrointestinal symptom severity.  
25  
26  
27  
28

29 The results of DCBE and RWC-TVS were compared to pathologic and surgical findings.  
30  
31 The radiologists conducting DCBE as well as the gynecologists conducting TVS were both  
32  
33 blinded to results of others. They were also blinded to clinical data, and only knew that the  
34  
35 intestinal endometriosis presence was suspected. All the patients underwent laparoscopy, which  
36  
37 was within one month after completion of investigations for diagnosis. Intestinal endometriosis  
38  
39 disease was defined by the minimum infiltration of muscularis propria. Endometriosis foci on  
40  
41 bowel serosa were peritoneal instead of bowel endometriosis. This study investigated the  
42  
43 accurateness of RWC-TVS and DCBE in assessing the bowel endometriosis presence, evaluating  
44  
45 the number and the size for nodules of bowel endometriosis as well as determining the existence  
46  
47 of peritoneal endometriosis with only intestinal serosa being infiltrated.  
48  
49  
50  
51  
52

### 53 **Technique of rectal water contrast transvaginal ultrasound**

54  
55  
56  
57  
58  
59  
60

1  
2  
3 Two physicians conducted all of the examinations in line with a standardized procedure. RWC-  
4  
5 TVS was conducted by utilizing a Voluson E6 machine connected with a transvaginal transducer.  
6  
7  
8 Once the transducer was placed in the vagina, a 6-mm flexible catheter was inserted in rectal  
9  
10 lumen with a distance of 15 cm to the anus through the anus. To facilitate of the catheter passage,  
11  
12 a gel containing lidocaine was applied. A 50 mL syringe connected with the catheter and warm  
13  
14 saline solution then was injected to the rectum as well as the sigmoid with ultrasonic control. The  
15  
16 saline solution amount for showing the rectosigmoid varied from 100 to 350 mL, based on the  
17  
18 intestinal wall dispensability. One hundred ml saline solution was slowly and continuously  
19  
20 instilled at the procedure beginning, and the rest solution was instilled if requested by ultrasound.  
21  
22  
23 When the saline solution wasn't being infused during the ultrasound, Klemmer forceps attached  
24  
25 to the catheter was placed to prevent backflow in the catheter. No significant saline solution  
26  
27 leakage in the space was seen between catheter and anus. Before, during as well as after saline  
28  
29 injection, images were taken. Bowel endometriosis was shown ultrasonographically as solid,  
30  
31 hypoechoic, nodular lesions, adjacent to or penetrating the wall of the intestine. Hyperechoic foci  
32  
33 sometimes may present inside the lesion. Intestinal distension permits defining the intestinal  
34  
35 nodule limits and various layers within rectal wall in particular so as to estimate infiltration depth.  
36  
37 The submucosa and intestinal serosa are hyperechoic. Two layers in muscularis propria were  
38  
39 shown as strips with hypoechoic divided by a thin hyperechoic line. Muscularis mucosa appears  
40  
41 hypoechoic, and interface connecting the lumen and mucosal layer appears hyperechoic.  
42  
43  
44 Infiltration of rectal endometriosis is verified by that hypoechoic nodules penetrate the wall of  
45  
46 the intestine and in general muscularis mucosa was thickened by the hypoechoic nodules. Two  
47  
48 different ultrasound signs are normally used to define this condition.  
49  
50  
51  
52  
53

#### 54 55 **DCBE** 56 57 58 59 60



1  
2  
3 All procedures by DCBE were conducted by a motorized and tilting table to perform radiological  
4 and fluoroscopic examination. For preparation, patients kept low-residue diet in a 1-day period  
5 before the examination so as to keep fluid of enteric content. Then examination was conducted  
6 after the intramuscular administration of Scopolamine at 20 mg (1 ampoule) dose so that colonic  
7 hypotonia was induced. The bowel endometriosis presence was diagnosed by DCBE if narrowed  
8 bowel lumen by any level was observed between the sigmoid and the anus related to the mucosa  
9 crenulation and/or speculated contour.

### 19 **Examinations tolerability**

20 Immediately after every examination, patients rated the level of discomfort experienced during  
21 DCBE as well as RWC-TVS using a 10 cm VAS. Mild pain was scored  $<2$  by moderate pain  
22 was scored  $\geq 2$ , and severe pain was scored  $>5$ .

### 29 **Operation and histological assessment**

30 The surgeons carefully examined the results and images by DCBE and RWC-TVS prior to the  
31 laparoscopy. Although the rectosigmoid endometriosis diagnosis and treatment were dependent  
32 on the laparoscopic findings, operational procedures were conducted through laparoscope  
33 evaluated by the team composed of colorectal as well as gynecological surgeons with lots of  
34 experience in the bowel endometriosis and pelvic treatment. At all cases, the rectum and sigmoid  
35 colon were examined systematically to confirm the endometriosis lesion presence after enough  
36 adhesiolysis. The lesions of bowel endometriosis were removed via intestinal resection, which  
37 happened in the cases of a single lesion with  $>3$  cm diameter or infiltrating 50% or more of the  
38 intestinal wall circumference, or at least three lesions infiltrating muscular layer. In all the other  
39 bowel endometriosis cases, disk resection of partial-thickness or full-thickness was conducted.  
40 Excision by shaving was conducted for intestinal lesions with simply the serosal layer of bowel  
41  
42  
43  
44  
45  
46  
47  
48  
49  
50  
51  
52  
53  
54  
55  
56  
57  
58  
59  
60

1  
2  
3 wall infiltrated. All of the visible lesions that were suspicious endometriosis were removed and  
4  
5 then sent for histology examination according to our clinical protocol.  
6  
7

8 The excised specimens were assessed by histology, and the infiltration depth of  
9  
10 endometriosis nodules of bowel wall was assessed. In nodulectomy cases, specimens were  
11  
12 oriented macroscopically along intestinal wall (from serosa to the mucosa) and cut to macro  
13  
14 sections with two mm thickness. From every macrosection tissue, blocks at 1.5 cm length were  
15  
16 attained in various numbers based on the lesion size, and sections at 5  $\mu$ m were attained for  
17  
18 microscopically evaluation from each tissue. In bowel resection cases specimens were  
19  
20 longitudinally opened through their entire lengths. Two mm bowel wall longitudinal bands were  
21  
22 dissected. The bands were embedded in the tissue blocks, and sections of 5  $\mu$ m were attained for  
23  
24 evaluation by microscopy.  
25  
26  
27  
28

### 29 **Statistical analysis**

30  
31 Sensitivity, specificity, negative predictive value (NPV), and positive predictive value (PPV)  
32  
33 were assessed for both RWC-TVS and DCBE. Each test diagnostic value was also measured by  
34  
35 negative likelihood ratio (LR-) and positive likelihood ratio (LR+). Efficacy parameters at 95%  
36  
37 confidence intervals were calculated. McNemar's test using Yates continuity correction was  
38  
39 utilized to compare accuracy of RWC-TVS and DCBE in the intestinal endometriosis diagnosis.  
40  
41 McNemar's test was utilized to compare the patient number in which the rectosigmoid nodule  
42  
43 numbers were identified by RWC-TVS and DCBE correctly. Accuracy of nodule size assessment  
44  
45 with these imaging methods was evaluated by subtracting nodule size assessed by these methods  
46  
47 from the nodule size assessed by histology. Nonparametric Mann-Whitney test was applied to  
48  
49 compare pain intensity of patients with RWC-TVS or DCBE. Chi-square test was utilized to  
50  
51 compare pain type (mild pain, moderate pain or severe pain). Spearman's rank correlation  
52  
53  
54  
55  
56  
57  
58  
59  
60

1  
2  
3 coefficient was applied to define whether correlation between pain intensity of patients  
4  
5 experiencing these two techniques exists. SPSS software was used for data analysis.  $P < 0.05$  was  
6  
7 considered as statistically significant.  
8  
9

## 10 11 12 **Results**

### 13 **Study population**

14  
15  
16  
17 Totally, 198 patients participated in this study and all underwent surgeries were involved in the  
18  
19 study (Figure 1). The major demographic characteristics in this study are displayed in Table 1.  
20  
21 The pain intensities as well as gastrointestinal symptoms are shown in Table 2.  
22  
23

24  
25 Surgery together with histology verified that bowel endometriosis nodules existed in 110  
26  
27 patients (55.6%). Endometriosis lesions infiltrated intestinal serosa among 28 patients. The  
28  
29 remaining 82 patients carried pelvic endometriosis yet no evidence for intestinal lesions. The  
30  
31 largest nodules of intestinal endometriosis were found located on sigmoid colon of 53 patients,  
32  
33 on rectum of 30 patients, at rectosigmoid junction of 20 patients, on ileum of 5 patients and on  
34  
35 caecum of 2 patients. 15 cases were found to have those endometriosis lesions that only infiltrate  
36  
37 intestinal serosa on sigmoid colon, 5 cases was on rectum in and 3 cases were at rectosigmoid  
38  
39 junction. The mean ( $\pm$ SD) lengths of bowel segments that were resected were  $12.2 \pm 3.6$  cm. The  
40  
41 endometriosis diagnosis was verified in all excised nodules by histology. Moreover, it showed  
42  
43 that 62 patients (56.4 %) had deepest endometriosis nodules infiltrating the muscularis propria,  
44  
45 31 patients (28.2%) with the submucosa infiltrated and 17 patients (15.5%) with the mucosa  
46  
47 infiltrated.  
48  
49  
50  
51  
52

### 53 **Accuracy of DCBE and RWC-TVS in the bowel endometriosis diagnosis**

54  
55  
56  
57  
58  
59  
60

1  
2  
3 Table 3 described the accuracy, specificity, sensitivity, NPV, PPV, LR- and LR+ of RWC-TVS  
4 and DCBE in the bowel endometriosis diagnosis. DCBE identified 106 among 110 patients of  
5 bowel endometriosis (96.4%). 4 patients with the rectum muscularis propria infiltrated by  
6 endometriosis nodules were not defined, and the rectum muscularis propria were removed using  
7 partial-thickness nodulectomy. RWC-TVS identified 97 among 110 patients of intestinal  
8 endometriosis (88.2%). RWC-TVS was not able to identify 3 rectal nodules, 4 ileal lesions, 2  
9 cecal lesions, and 4 sigmoid nodules infiltrating muscularis propria. Moreover, we found 4 of the  
10 patients with large and bilateral endometriosis in ovarian cysts, and they may hamper the  
11 intestinal nodules identification. There were 2 false positives of RWC-TVS, where endometriosis  
12 nodules in rectovagina were defined to infiltrate rectum muscularis.  
13  
14  
15  
16  
17  
18  
19  
20  
21  
22  
23  
24  
25  
26

27 Surgery verified the rectovaginal nodule presence but didn't reveal rectal muscularis  
28 infiltration. The specificity, sensitivity, NPV, PPV, LR-, LR+, as well as accuracy of these two  
29 techniques in the intestinal endometriosis diagnosis were presented in Table 3. McNemar's test  
30 displayed that no significant differences were found in accuracy of these two techniques for  
31 bowel endometriosis diagnosis ( $P=0.109$ ). Histology examination showed that in 53 patients  
32 endometriosis infiltrated rectosigmoid colon submucosa or mucosa. DCBE correctly defined the  
33 infiltration depth in 27 of the patients (50.9%), while RWC-TVS correctly defined the infiltration  
34 depth in 20 of the patients (37.7%) ( $P=0.126$ ). All other nodules infiltrated the mucosa or  
35 submucosa by histology was identified to only reach muscularis at RWC-TVS and DCBE. Both  
36 of these two techniques did not have false-positive cases of submucosal or mucosal infiltration  
37 diagnosis. Both RWC-TVS and DCBE underestimated the endometriosis nodules size.  
38 Nevertheless, underestimation was smaller for DCBE than for RWC-TVS (Table 4).  
39  
40  
41  
42  
43  
44  
45  
46  
47  
48  
49  
50  
51  
52  
53  
54  
55  
56  
57  
58  
59  
60

1  
2  
3 Additionally, in both techniques underestimation was larger for the nodules with the diameter  $\geq$   
4  
5 30 mm.  
6  
7

### 8 **Tolerability of RWC-TVS and DCBE**

9  
10 DCBE was conducted safely in all patients. During both examinations all patients were able to  
11  
12 tolerate intestinal distension. It was necessary to Interruption the whole procedure is not  
13  
14 necessary for all patients. However, the pain intensity experienced in the course of DCBE was  
15  
16 higher than that was experienced in the course of RWC-TVS (Table 5). A positive correlation  
17  
18 was detected between the pain intensity experienced by patients throughout these two  
19  
20 examinations (Spearman correlation coefficient=0.575,  $p < 0.001$ ).  
21  
22  
23  
24  
25  
26

### 27 **Discussion**

28  
29 This study is the first time to demonstrate that RWC-TVS and DCBE have comparable accuracy  
30  
31 in bowel endometriosis diagnosis. Both DCBE and RWC-TVS underestimated the nodule size of  
32  
33 bowel endometriosis, while underestimation was less for DCBE than for RWC-TVS, especially  
34  
35 for the nodules with largest diameters  $\geq 30$  mm as shown in Table 4. Choosing ultrasonic  
36  
37 technique often depends on the ultrasonographer experience rather than superiority evidence of  
38  
39 one technique in comparison to others. In fact, TVS are required to be conducted by highly  
40  
41 skillful professionals, and it was estimated recently that it requires conduction of about 40 cases  
42  
43 [17] for the learning curve of an accurate deep pelvic endometriosis diagnosis by TVS.  
44  
45 Consequently, it is kind of difficult to attain such extent of experience for the ultrasonographers  
46  
47 in small hospitals. Main advantage for DCBE is that, with the entire colon retrograde distension,  
48  
49 it provides the complete overview for the entire colon [18]. In this study, rectosigmoid was target  
50  
51 of the distension for the aim in the current study was to compare to RWC-TVS and also right  
52  
53  
54  
55  
56  
57  
58  
59  
60

1  
2  
3 colon endometriosis lesions are outside of the transvaginal approach field view. The reason that  
4  
5 RWC-TVS was selected to compare to DCBE is because of the personal experience and the  
6  
7 common bowel distension criterion with fluid. The authors subsequently confirmed usefulness of  
8  
9 this technique in large series. Additionally, other authors have confirmed that opacification and  
10  
11 intestinal distension with ultrasound gel are helpful for visualizing nodules of rectosigmoid  
12  
13 endometriosis [19 20].  
14  
15

16  
17 Previous studies suggested the reliability of TVS for rectosigmoid endometriosis  
18  
19 diagnosis. The TVS sensitivity for rectosigmoid endometriosis detection is from 91 to 98%, the  
20  
21 specificity is from 97 to 100%, the PPV is from 97 to 100% and the NPV is from 87 to 98% [21-  
22  
23 24]. Recently, RWC-TVS was developed in order to facilitate intestinal lesion identification in  
24  
25 patients of rectovaginal endometriosis as well as to determine endometriosis infiltration depth in  
26  
27 intestinal wall [25]. TVS was utilized in patients of bowel endometriosis extensively recently,  
28  
29 though little results are available for DCBE use of these patients. This study verified that RWC-  
30  
31 TVS and DCBE have comparable accuracy in bowel endometriosis diagnosis. Both of these two  
32  
33 techniques estimated the rectosigmoid nodule length precisely, while DCBE was even accurate  
34  
35 than RWC-TVS for measuring the distance from the anal verge to the endometriosis nodule [9].  
36  
37 Visibly, the extensive experiences of the gynecologist and the radiologist in RWC-TVS and  
38  
39 DCBE, may have affected the accurateness of the techniques in bowel endometriosis diagnosis  
40  
41 [24 26]. The findings could be explained by that when conducting imaging techniques, especially  
42  
43 RWC-TVS, it may be difficult to choose the plane where the irregular nodule of endometriosis  
44  
45 has the longest diameter. Nevertheless, difference between the longest diameter and the  
46  
47 estimated nodule size as assessed by histopathology was very small and also, most of the times it  
48  
49 doesn't seem this difference influence the choice for bowel resection or nodulectomy as  
50  
51  
52  
53  
54  
55  
56  
57  
58  
59  
60

1  
2  
3 treatment [27]. Importantly, the patients tolerated RWC-TVS better compared they did with  
4  
5 DCBE. The findings are consistent with those previous studies indicating the accurateness of  
6  
7  
8  
9  
10  
11  
12  
13  
14  
15  
16  
17  
18  
19  
20  
21  
22  
23  
24  
25  
26  
27  
28  
29  
30  
31  
32  
33  
34  
35  
36  
37  
38  
39  
40  
41  
42  
43  
44  
45  
46  
47  
48  
49  
50  
51  
52  
53  
54  
55  
56  
57  
58  
59  
60

treatment [27]. Importantly, the patients tolerated RWC-TVS better compared they did with DCBE. The findings are consistent with those previous studies indicating the accurateness of TVS for bowel endometriosis diagnosis and its comparison of TVS to the other techniques like rectal endoscopic ultrasound and MRI [11 28-30].

11  
12  
13  
14  
15  
16  
17  
18  
19  
20  
21  
22  
23  
24  
25  
26  
27  
28  
29  
30  
31  
32  
33  
34  
35  
36  
37  
38  
39  
40  
41  
42  
43  
44  
45  
46  
47  
48  
49  
50  
51  
52  
53  
54  
55  
56  
57  
58  
59  
60

Researchers have questioned potential benefits by the introduction of aqueous contrast medium into rectum through TVS. TVS is dependent on the operator and it's possible that differences observed for the accurateness by the technique are caused by the ultrasonographer experience conducting the procedure [31]. However, application of intestinal aqueous contrast into TVS could facilitate the rectosigmoid lesion identification. Other methods have been suggested for improving the TVS accuracy in deep endometriosis detection, including using large amount transmission gel for ultrasound (12 mL) in probe cover or sonovaginography [32]. Till now, there is no study has demonstrated any ultrasonic technique better than others in deep endometriosis diagnosis.

11  
12  
13  
14  
15  
16  
17  
18  
19  
20  
21  
22  
23  
24  
25  
26  
27  
28  
29  
30  
31  
32  
33  
34  
35  
36  
37  
38  
39  
40  
41  
42  
43  
44  
45  
46  
47  
48  
49  
50  
51  
52  
53  
54  
55  
56  
57  
58  
59  
60

TVS was suggested to be considered as the first investigation for patients of deep endometriosis and TVS allows for intestinal lesions diagnosis [24]. Other investigations including DCBE, MDCT-e, RWC-TVS, rectal endoscopic ultrasound and MRI should be utilized to determine intestinal endometriosis characteristics, such as the nodules size and number, the intestinal wall infiltration depth of nodules and the stenosis degree of bowel lumen [33-35]. RWC-TVS has some advantages over other techniques. For example, RWC-TVS is less expensive than MRI and MDCT-e and the required equipment for RWC-TVS is usually available to the gynecologists, who are typically involved in endometriosis patient management. Recently a study showed that RWC-TVS permit the stenosis degree estimation of intestinal lumen which is caused by the endometriosis [36]. Unfortunately, the current study did not

1  
2  
3 examine this parameter, which is a limitation in our investigation. Theoretically, RWC-TVS  
4  
5 should also permit determination of the disease extent along longitudinal axis of the intestine.  
6  
7  
8 Apparently, RWC-TVS could not determine intestinal nodule presence located in the proximal of  
9  
10 sigmoid because the lesions are outside of the view field in TVS.  
11

12  
13 The current study has several limitations. First, experience of ultrasonographer  
14  
15 conducting RWC-TVS may affect the accurateness of the techniques in bowel endometriosis  
16  
17 diagnosis. Second, the surgeons know the findings by RWC-TVS and DCBE. Though in an ideal  
18  
19 study surgeons should not be aware of the findings by preoperative investigations, this  
20  
21 theoretical design is unethical clinically, for diagnostic imaging would facilitate the nodule  
22  
23 identification of intestinal endometriosis during surgery. Moreover, the knowledge of the  
24  
25 preoperative investigation findings only helps the surgeons to identify actually presenting  
26  
27 endometriosis nodules. Third, DCBE and RWC-TVS didn't estimate the circumference  
28  
29 percentage of intestinal wall that was infiltrated by the endometriosis, a criterion for choosing  
30  
31 between bowel resection and nodulectomy. Hence, patients scheduling for nodulectomy based on  
32  
33 the findings of RWC-TVS and DCBE should be aware of that the bowel resection may be  
34  
35 required to excise the intestinal endometriosis completely. Future studies would investigate  
36  
37 whether RWC-TVS and DCBE can estimate the intestinal circumference percentage by  
38  
39 endometriosis infiltration reliably. DCBE might still play a role for diagnosis workup in patients  
40  
41 of suspicious bowel endometriosis. When RWC-TVS or TVS shows bowel muscularis infiltrated  
42  
43 by big intestinal nodules, the bowel resection could probably be conducted without further  
44  
45 examinations unless surgeons want to exclude the intestinal lesions close to sigmoid. When  
46  
47 ultrasound shows one bowel nodule which might be removed by using nodulectomy, DCBE is  
48  
49  
50  
51  
52  
53  
54  
55  
56  
57  
58  
59  
60



1  
2  
3 better to be utilized to exclude other intestinal nodule presence in order to plan the operating  
4  
5 procedure with colorectal surgeon as well as the patient adequately.  
6  
7

8 This study demonstrated RWC-TVS as a very reliable technique to determine the bowel  
9  
10 endometriosis presence and extent and it has similar accuracy to that of DCBE. Nevertheless,  
11  
12 RWC-TVS may underestimate multiple bowel nodule presence sometimes, and be conducted  
13  
14 easily in the ambulatory setting; also it is easily tolerated by the patients. It is hypothesized to  
15  
16 combine DCBE and TVS to attain a complete bowel preoperative assessment so as to provide  
17  
18 adequate counseling to the patients and the most suitable surgical treatment in one step.  
19  
20  
21  
22  
23  
24  
25  
26  
27

### 28 **Data sharing statement**

29  
30  
31 All data generated or analysed during this study are included in this published article. No  
32  
33 additional unpublished data.  
34  
35  
36  
37  
38  
39  
40

### 41 **Author's contribution**

42  
43  
44 Collected the data: Jipeng Jiang, Ying Liu, Kun Wang, Xixiang Wu; Designed the study and  
45  
46 wrote the manuscript: Ying Tang; All authors approved the final submission.  
47  
48  
49  
50  
51  
52

### 53 **Funding**

54  
55  
56  
57 None.  
58  
59  
60

## Acknowledgments

None.

## Conflict of interests

The authors declare no conflict of interests.

## References

- 1 Remorgida V, Ferrero S, Fulcheri E, et al. Bowel endometriosis: presentation, diagnosis, and treatment. *Obstet Gynecol Surv* 2007;**62**(7):461-70.
- 2 Remorgida V, Ragni N, Ferrero S, et al. The involvement of the interstitial Cajal cells and the enteric nervous system in bowel endometriosis. *Hum Reprod* 2005;**20**(1):264-71.
- 3 Ferrero S, Biscaldi E, Morotti M, et al. Multidetector computerized tomography enteroclysis vs. rectal water contrast transvaginal ultrasonography in determining the presence and extent of bowel endometriosis. *Ultrasound Obstet Gynecol* 2011;**37**(5):603-13.
- 4 Menada MV, Remorgida V, Abbamonte LH, et al. Transvaginal ultrasonography combined with water-contrast in the rectum in the diagnosis of rectovaginal endometriosis infiltrating the bowel. *Fertil Steril* 2008;**89**(3):699-700.
- 5 Abrao MS, Goncalves MO, Dias JA, Jr., et al. Comparison between clinical examination, transvaginal sonography and magnetic resonance imaging for the diagnosis of deep endometriosis. *Hum Reprod* 2007;**22**(12):3092-7.
- 6 Podgaec S, Abrao MS, Dias JA, Jr., et al. Endometriosis: an inflammatory disease with a Th2 immune response component. *Hum Reprod* 2007;**22**(5):1373-9.

- 1  
2  
3  
4  
5  
6  
7  
8  
9  
10  
11  
12  
13  
14  
15  
16  
17  
18  
19  
20  
21  
22  
23  
24  
25  
26  
27  
28  
29  
30  
31  
32  
33  
34  
35  
36  
37  
38  
39  
40  
41  
42  
43  
44  
45  
46  
47  
48  
49  
50  
51  
52  
53  
54  
55  
56  
57  
58  
59  
60
- 7 Leone Roberti Maggiore U, Biscaldi E, Vellone GV, et al. Magnetic resonance enema versus rectal water contrast transvaginal ultrasonography in the diagnosis of rectosigmoid endometriosis. *Ultrasound Obstet Gynecol* 2016.
- 8 Ferrero S. Endometriosis: Modern management of an ancient disease. *Eur J Obstet Gynecol Reprod Biol* 2016.
- 9 Ferrero S, Biscaldi E, Vellone VG, et al. Computed tomographic colonography versus rectal-water contrast transvaginal ultrasonography in the diagnosis of rectosigmoid endometriosis: a pilot study. *Ultrasound Obstet Gynecol* 2016.
- 10 Guerriero S, Condous G, van den Bosch T, et al. Systematic approach to sonographic evaluation of the pelvis in women with suspected endometriosis, including terms, definitions and measurements: a consensus opinion from the International Deep Endometriosis Analysis (IDEA) group. *Ultrasound Obstet Gynecol* 2016;**48**(3):318-32.
- 11 Hudelist G, English J, Thomas AE, et al. Diagnostic accuracy of transvaginal ultrasound for non-invasive diagnosis of bowel endometriosis: systematic review and meta-analysis. *Ultrasound Obstet Gynecol* 2011;**37**(3):257-63.
- 12 Leone Roberti Maggiore U, Ferrero S, Mangili G, et al. A systematic review on endometriosis during pregnancy: diagnosis, misdiagnosis, complications and outcomes. *Hum Reprod Update* 2016;**22**(1):70-103.
- 13 Savelli L, Manuzzi L, Coe M, et al. Comparison of transvaginal sonography and double-contrast barium enema for diagnosing deep infiltrating endometriosis of the posterior compartment. *Ultrasound Obstet Gynecol* 2011;**38**(4):466-71.
- 14 Darwish B, Roman H. Surgical treatment of deep infiltrating rectal endometriosis: in favor of less aggressive surgery. *Am J Obstet Gynecol* 2016;**215**(2):195-200.

- 1  
2  
3 15 Darwish B, Roman H. Nerve Sparing and Surgery for Deep Infiltrating Endometriosis:  
4  
5 Pessimism of the Intellect or Optimism of the Will. *Semin Reprod Med* 2016.  
6  
7  
8 16 Roman H, Darwish B, Schmied R, et al. Combined vaginal-laparoscopic-transanal approach  
9  
10 for reducing bladder dysfunction after conservative surgery in large deep rectovaginal  
11  
12 endometriosis. *J Gynecol Obstet Biol Reprod (Paris)* 2016;**45**(6):546-8.  
13  
14  
15 17 Tammaa A, Fritzer N, Strunk G, et al. Learning curve for the detection of pouch of Douglas  
16  
17 obliteration and deep infiltrating endometriosis of the rectum. *Hum Reprod*  
18  
19 2014;**29**(6):1199-204.  
20  
21  
22 18 Scardapane A, Bettocchi S, Lorusso F, et al. Diagnosis of colorectal endometriosis:  
23  
24 contribution of contrast enhanced MR-colonography. *Eur Radiol* 2011;**21**(7):1553-63.  
25  
26  
27 19 Loubeyre P, Copercini M, Frossard JL, et al. Pictorial review: rectosigmoid endometriosis on  
28  
29 MRI with gel opacification after rectosigmoid colon cleansing. *Clin Imaging*  
30  
31 2012;**36**(4):295-300.  
32  
33  
34 20 Loubeyre P, Petignat P, Jacob S, et al. Anatomic distribution of posterior deeply infiltrating  
35  
36 endometriosis on MRI after vaginal and rectal gel opacification. *AJR Am J Roentgenol*  
37  
38 2009;**192**(6):1625-31.  
39  
40  
41 21 Bazot M, Lafont C, Rouzier R, et al. Diagnostic accuracy of physical examination,  
42  
43 transvaginal sonography, rectal endoscopic sonography, and magnetic resonance imaging  
44  
45 to diagnose deep infiltrating endometriosis. *Fertil Steril* 2009;**92**(6):1825-33.  
46  
47  
48 22 Goncalves MO, Podgaec S, Dias JA, Jr., et al. Transvaginal ultrasonography with bowel  
49  
50 preparation is able to predict the number of lesions and rectosigmoid layers affected in  
51  
52 cases of deep endometriosis, defining surgical strategy. *Hum Reprod* 2010;**25**(3):665-71.  
53  
54  
55  
56  
57  
58  
59  
60

- 1  
2  
3  
4  
5  
6  
7  
8  
9  
10  
11  
12  
13  
14  
15  
16  
17  
18  
19  
20  
21  
22  
23  
24  
25  
26  
27  
28  
29  
30  
31  
32  
33  
34  
35  
36  
37  
38  
39  
40  
41  
42  
43  
44  
45  
46  
47  
48  
49  
50  
51  
52  
53  
54  
55  
56  
57  
58  
59  
60
- 23 Bazot M, Malzy P, Cortez A, et al. Accuracy of transvaginal sonography and rectal endoscopic sonography in the diagnosis of deep infiltrating endometriosis. *Ultrasound Obstet Gynecol* 2007;**30**(7):994-1001.
- 24 Piketty M, Chopin N, Dousset B, et al. Preoperative work-up for patients with deeply infiltrating endometriosis: transvaginal ultrasonography must definitely be the first-line imaging examination. *Hum Reprod* 2009;**24**(3):602-7.
- 25 Valenzano Menada M, Remorgida V, Abbamonte LH, et al. Does transvaginal ultrasonography combined with water-contrast in the rectum aid in the diagnosis of rectovaginal endometriosis infiltrating the bowel? *Hum Reprod* 2008;**23**(5):1069-75.
- 26 Ferrero S, Anserini P, Abbamonte LH, et al. Fertility after bowel resection for endometriosis. *Fertil Steril* 2009;**92**(1):41-6.
- 27 Fritzer N, Tammaa A, Salzer H, et al. Dyspareunia and quality of sex life after surgical excision of endometriosis: a systematic review. *Eur J Obstet Gynecol Reprod Biol* 2014;**173**:1-6.
- 28 Guerriero S, Ajossa S, Minguez JA, et al. Accuracy of transvaginal ultrasound for diagnosis of deep endometriosis in uterosacral ligaments, rectovaginal septum, vagina and bladder: systematic review and meta-analysis. *Ultrasound Obstet Gynecol* 2015;**46**(5):534-45.
- 29 Guerriero S, Ajossa S, Orozco R, et al. Accuracy of transvaginal ultrasound for diagnosis of deep endometriosis in the rectosigmoid: systematic review and meta-analysis. *Ultrasound Obstet Gynecol* 2016;**47**(3):281-9.
- 30 Hudelist G, Ballard K, English J, et al. Transvaginal sonography vs. clinical examination in the preoperative diagnosis of deep infiltrating endometriosis. *Ultrasound Obstet Gynecol* 2011;**37**(4):480-7.

- 1  
2  
3 31 Biscaldi E, Ferrero S, Remorgida V, et al. Rectosigmoid endometriosis with unusual  
4 presentation at magnetic resonance imaging. *Fertil Steril* 2009;**91**(1):278-80.  
5  
6  
7  
8 32 Guerriero S, Ajossa S, Gerada M, et al. "Tenderness-guided" transvaginal ultrasonography: a  
9 new method for the detection of deep endometriosis in patients with chronic pelvic pain.  
10 *Fertil Steril* 2007;**88**(5):1293-7.  
11  
12  
13 33 Philip CA, Bisch C, Coulon A, et al. Correlation between three-dimensional rectosonography  
14 and magnetic resonance imaging in the diagnosis of rectosigmoid endometriosis: a  
15 preliminary study on the first fifty cases. *Eur J Obstet Gynecol Reprod Biol* 2015;**187**:35-  
16 40.  
17  
18  
19  
20  
21  
22  
23  
24 34 Landi S, Barbieri F, Fiaccavento A, et al. Preoperative double-contrast barium enema in  
25 patients with suspected intestinal endometriosis. *J Am Assoc Gynecol Laparosc*  
26 2004;**11**(2):223-8.  
27  
28  
29  
30  
31 35 Biscaldi E, Ferrero S, Leone Roberti Maggiore U, et al. Multidetector computerized  
32 tomography enema versus magnetic resonance enema in the diagnosis of rectosigmoid  
33 endometriosis. *Eur J Radiol* 2014;**83**(2):261-7.  
34  
35  
36  
37  
38 36 Bergamini V, Ghezzi F, Scarperi S, et al. Preoperative assessment of intestinal endometriosis:  
39 A comparison of transvaginal sonography with water-contrast in the rectum, transrectal  
40 sonography, and barium enema. *Abdom Imaging* 2010;**35**(6):732-6.  
41  
42  
43  
44  
45  
46  
47  
48  
49  
50  
51  
52  
53  
54  
55  
56  
57  
58  
59  
60

1  
2  
3 **Figure Legend**  
4  
5

6 **Fig.1** Flowchart of the study.  
7  
8  
9  
10  
11  
12  
13  
14  
15  
16  
17  
18  
19  
20  
21  
22  
23  
24  
25  
26  
27  
28  
29  
30  
31  
32  
33  
34  
35  
36  
37  
38  
39  
40  
41  
42  
43  
44  
45  
46  
47  
48  
49  
50  
51  
52  
53  
54  
55  
56  
57  
58  
59  
60

For peer review only

**Table 1. Characteristics of study population**

|                                      | <b>n=198</b> |
|--------------------------------------|--------------|
| Age (year)                           | 32.7±4.9     |
| BMI (kg/m <sup>2</sup> )             | 23.4±2.4     |
| Previous surgery for endometriosis   | 78 (39.4)    |
| Previous live births                 | 53 (26.8)    |
| <b>Hormonal therapy</b>              |              |
| None                                 | 109 (55.1)   |
| Sequential oral contraceptive        | 44 (22.2)    |
| Norethisterone acetate               | 20 (10.1)    |
| Continuous oral contraceptive        | 13 (6.6)     |
| Norethisterone acetate and letrozole | 12 (6.1)     |

Values were expressed as n (%) or mean ± SD. BMI: body mass index



**Table 2. Intensity of pain and gastrointestinal symptoms of the study population (n=198)**

|                              | <b>Patients with symptom n (%)</b> | <b>Intensity (mean ±SD)</b> |
|------------------------------|------------------------------------|-----------------------------|
| Dysmenorrhea                 | 171 (86.4)                         | 6.9±1.6                     |
| Deep dyspareunia             | 127 (64.1)                         | 5.5 ± 1.5                   |
| Non-menstrual pelvic pain    | 145 (73.2)                         | 5.7 ± 1.2                   |
| Dyschezia                    | 93 (47.0)                          | 5.1 ± 1.9                   |
| Diarrhea-predominant IBS     | 63 (31.8)                          | 7.1 ± 2.1                   |
| Constipation-predominant IBS | 87 (43.9)                          | 7.6 ± 1.9                   |
| Passage of mucus             | 42 (21.2)                          | 6.1 ± 1.7                   |
| Rectal bleeding              | 19 (9.6)                           | 5.3 ± 1.1                   |
| Intestinal cramping          | 98 (49.5)                          | 6.8 ± 1.9                   |
| Abdominal bloating           | 119 (60.1)                         | 6.5 ± 2.2                   |

Values were expressed as n (%) or mean ± SD. Intensity of pain symptoms assessed using 10-cm visual analogue scale (VAS)

**Table 3. Diagnostic performance of rectal Ewater contrast transvaginal ultrasonography (RWC-TVS) and double-contrast barium enema (DCBE) in the diagnosis of bowel and rectosigmoid endometriosis (n=198)**

|                            | DCBE           | RWC-TVS        |
|----------------------------|----------------|----------------|
| <b>Bowel endometriosis</b> |                |                |
| Sensitivity                | 106/110 (96.4) | 97/110 (88.2)  |
| Specificity                | 97/97 (100)    | 95/97 (97.3)   |
| PPV                        | 106/106 (100)  | 97/99 (98.0)   |
| NPV                        | 97/101 (96.0)  | 95/108 (88.0)  |
| LR+                        | N/A            | 41.67          |
| LR-                        | 0.04           | 0.13           |
| Accuracy                   | 194/198 (98.0) | 183/198 (92.4) |

Values were expressed as n (%). Bowel endometriosis defined as disease infiltrating at least the muscularis propria. LR+ could not be calculated because there was no false positive. LR+, positive likelihood ratio; LR-, negative likelihood ratio; NPV, negative predictive value; PPV, positive predictive value.

**Table 4. Difference between size of the largest nodule estimated by imaging techniques and that assessed on histopathology**

|                                             | Largest diameter on histology (mm, mean $\pm$ SD) | DCBE                          |                          | RWC-TVS                       |                          |
|---------------------------------------------|---------------------------------------------------|-------------------------------|--------------------------|-------------------------------|--------------------------|
|                                             |                                                   | Mean difference (mm (95% CI)) | Limits of agreement (mm) | Mean difference (mm (95% CI)) | Limits of agreement (mm) |
| All nodules ( n=110)                        | 28.5 $\pm$ 6.9                                    | 1.62 (0.98- 2.23)             | -4.32 to 7.43            | 2.27 (1.23- 3.43)             | -3.12 to 4.23            |
| Nodules with diameter <30 mm ( n= 77)       | 22.7 $\pm$ 4.1                                    | 0.73 (0.11- 1.32)             | -2.92 to 5.37            | 1.65 (0.81- 2.76)             | -2.32 to 3.78            |
| Nodules with diameter $\geq$ 30 mm ( n= 33) | 35.9 $\pm$ 4.2                                    | 3.01 (1.96- 4.15)             | -5.56 to 8.34            | 3.91 (2.34- 5.95)             | -5.12 to 8.91            |

Mean difference calculated by subtracting size of nodule assessed by imaging technique from size of nodule assessed on histology. Limits of agreement calculated as mean difference  $\pm$  2 SDs of the difference. RWC-TVS, rectal water contrast transvaginal ultrasonography; DCBE, double-contrast barium enema.

**Table 5. Intensity of pain experienced by 198 patients during rectal water contrast transvaginal ultrasonography (RWC-TVS) and double-contrast barium enema (DCBE) as assessed on a 10-cm visual analog scale (VAS)**

| <b>Intensity of pain</b>                        | <b>RWC-TVS</b> | <b>DCBE</b>   | <b>p value</b> |
|-------------------------------------------------|----------------|---------------|----------------|
| Overall intensity of pain (mean $\pm$ SD)       | 3.9 $\pm$ 1.8  | 4.9 $\pm$ 2.3 | < 0.001        |
| Categorical intensity of pain (n (%))           |                |               | < 0.001        |
| Mild pain (VAS score <2)                        | 30 (15.2)      | 9 (4.5)       |                |
| Moderate pain (VAS score $\geq$ 2 and $\leq$ 5) | 119 (60.1)     | 80 (40.4)     |                |
| Severe pain (VAS score > 5)                     | 49 (24.7)      | 109 (55.1)    |                |

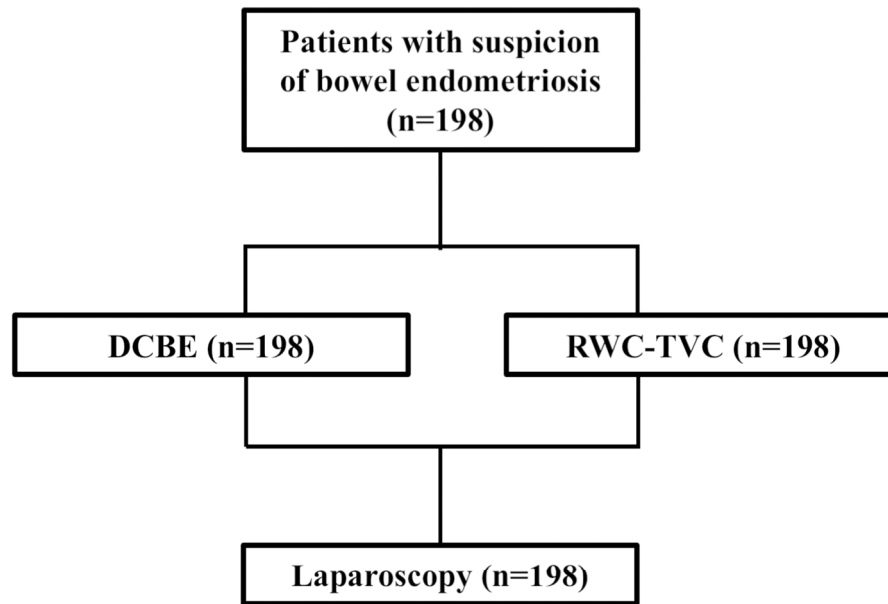

Fig.1

126x90mm (300 x 300 DPI)

# BMJ Open

## Rectal water contrast transvaginal ultrasound versus double-contrast barium enema in the diagnosis of bowel endometriosis

|                                 |                                                                                                                                                                                                                                                                                                                                                                   |
|---------------------------------|-------------------------------------------------------------------------------------------------------------------------------------------------------------------------------------------------------------------------------------------------------------------------------------------------------------------------------------------------------------------|
| Journal:                        | <i>BMJ Open</i>                                                                                                                                                                                                                                                                                                                                                   |
| Manuscript ID                   | bmjopen-2017-017216.R1                                                                                                                                                                                                                                                                                                                                            |
| Article Type:                   | Research                                                                                                                                                                                                                                                                                                                                                          |
| Date Submitted by the Author:   | 26-May-2017                                                                                                                                                                                                                                                                                                                                                       |
| Complete List of Authors:       | Jiang, Jipeng; Tianjin First Center Hospital, Department of Ultrasound<br>Liu, Ying; Tianjin First Center Hospital, Department of Ultrasound<br>Wang, Kun; Tianjin First Center Hospital, Department of Ultrasound<br>Wu, Xixiang; Tianjin First Center Hospital, Department of Ultrasound<br>Tang, Ying; Tianjin First Center Hospital, Department of Ultrasound |
| <b>Primary Subject Heading</b>: | Public health                                                                                                                                                                                                                                                                                                                                                     |
| Secondary Subject Heading:      | Public health                                                                                                                                                                                                                                                                                                                                                     |
| Keywords:                       | bowel endometriosis, double-contrast barium enema, diagnosis, rectal water contrast transvaginal ultrasound                                                                                                                                                                                                                                                       |
|                                 |                                                                                                                                                                                                                                                                                                                                                                   |

SCHOLARONE™  
Manuscripts

1  
2  
3 **Original article**  
4

5 **Rectal water contrast transvaginal ultrasound versus double-contrast barium enema in the**  
6  
7  
8 **diagnosis of bowel endometriosis**  
9

10  
11  
12 Running title: Comparison of RWC-TVS and DCBE  
13

14 Jipeng Jiang, Ying Liu, Kun Wang, Xixiang Wu, Ying Tang \*  
15

16  
17 Department of Ultrasound, Tianjin First Center Hospital, No. 24 Fukang Road, Nankai District,  
18  
19 Tianjin 300192, China  
20

21  
22  
23  
24 \*Corresponding author: Ying Tang, Department of Ultrasound, Tianjin First Center Hospital, No.  
25  
26 24 Fukang Road, Nankai District, Tianjin 300192, China  
27

28  
29 E-mail: [dr\\_tangying@sina.com](mailto:dr_tangying@sina.com)  
30

31  
32 Tel.: +86-13702138582  
33  
34  
35  
36  
37  
38  
39  
40  
41  
42  
43  
44  
45  
46  
47  
48  
49  
50  
51  
52  
53  
54  
55  
56  
57  
58  
59  
60

## Abstract

**Objectives** The aim of study was to compare the accuracy between rectal water contrast transvaginal ultrasound (RWC-TVS) and double-contrast barium enema (DCBE) in evaluating the bowel endometriosis presence as well as its extent.

**Design & Setting** 198 patients at reproductive age with suspicious bowel endometriosis were included. Physicians in two groups specialized at endometriosis performed RWC-TVS as well as DCBE before laparoscopy, and both groups were blinded to other groups' results. Findings from RWC-TVS or DCBE were compared to histological results. The severity of experienced pain severity through RWC-TVS or DCBE was assessed by an analog scale of 10 cm.

**Results** In total, 110 in 198 women were confirmed to have endometriosis nodules in the bowel by laparoscopy as well as histopathology. For bowel endometriosis diagnosis, DCBE and RWC-TVS demonstrated sensitivities of 96.4% and 88.2%, specificities of 100% and 97.3%, positive prediction values of 100% and 98.0%, negative prediction values of 98.0% and 88.0%, accuracies of 98.0% and 92.4% respectively. DCBE was related to more tolerance than RWC-TVS.

**Conclusions** RWC-TVS and DCBE demonstrated similar accuracies in the bowel endometriosis diagnosis, however, patients showed more tolerance for RWC-TVS than those with DCBE.

**Keywords:** bowel endometriosis; double-contrast barium enema; diagnosis; rectal water contrast transvaginal ultrasound



**Strengths and limitations of this study**

1. This is the first comparison of the accuracy between RWC-TVS and DCBE in the diagnosis of bowel endometriosis.
2. This study demonstrated RWC-TVS as a very reliable technique to determine the bowel endometriosis presence and extent and it has similar accuracy to that of DCBE.
3. We demonstrate DCBE is related to more tolerance than RWC-TVS.
4. This study requires a larger sample once suitable participants become available.

## Introduction

Bowel endometriosis influences 4-37% patients of endometriosis <sup>1</sup>. Lesions in intestinal endometriosis have variable sizes <sup>2</sup>. Endometriosis nodules of small sizes locate in the bowel serosal surface hardly causing symptoms and treatments are not required <sup>2</sup>. Endometriosis nodules of larger sizes may infiltrate the wall of bowel and cause some gastrointestinal complaints such as diarrhea, dyschezia, constipation, intestinal cramping, and abdominal bloating <sup>1 3</sup>. The symptoms mimic acute bowel syndrome. The symptoms with bowel endometriosis mainly are nonspecific, usually causing misdiagnosis or diagnosis delay <sup>4</sup>. Physical examinations may suggest rectovaginal endometriosis presence. However, the accuracy is poor in identifying rectosigmoid nodules <sup>5 6</sup>.

Until recently, endometriosis diagnosis ultrasound was limited to ovarian endometriosis patients. Other imaging methods were utilized for assessing bowel endometriosis, such as rectal endoscopic ultrasound, double-contrast barium enema (DCBE), transvaginal ultrasound (TVS), magnetic resonance imaging (MRI), virtual colonoscopy, and multidetector computerized tomography enema (MDCT-e) <sup>7-10</sup>. TVS, as a reliable and non-invasive method for assessing bowel endometriosis presence and extent <sup>11</sup>. Rectosigmoid nodules identification maybe facilitated by saline injection through a catheter going into the rectum through rectal-water contrast TVS (RWC-TVS), assessment of infiltration depth of endometriosis on intestinal wall as well as estimation of stenosis degree in the bowel lumen. Yet, no studies have compared the accurateness between DCBE and RWC-TVS in rectosigmoid endometriosis diagnosis <sup>4 12 13</sup>.

The diagnosis of bowel endometriosis presence and extent before the surgery is necessary for making a decision on whether the operation is required as well as planning the operation procedure with colorectal surgeons <sup>14</sup>. Preoperational knowledge of intestinal endometriosis

1  
2  
3 nodules size, number, nodule infiltration depth on the wall of intestine, as well as bowel lumen  
4  
5 stenosis degree allows for making best decision on whether the surgery is requisite and whether  
6  
7 nodulectomy or bowel segmental resection should be chosen<sup>15 16</sup>.  
8  
9

10 Additionally, preoperational determining of bowel endometriosis extent allows for that  
11 the surgeon informs the patient of the benefits as well as potential complications during the  
12 operation procedure to be performed. In fact, evolution or complications of the symptoms in  
13 digestive system post-surgery may be different for patients experiencing nodulectomy and  
14 segmental resection. In this study, we assessed and compared the diagnosis accuracy between  
15 DCBE and RWC-TVS for evaluating the bowel endometriosis presence and extent.  
16  
17  
18  
19  
20  
21  
22  
23  
24  
25  
26

## 27 **Materials and Methods**

### 28 **Study population**

29  
30 This study was conducted from May 2012 to Aug 2016. Patients at the reproductive ages with  
31  
32 laparoscopy scheduled for intestinal endometriosis suspicious clinical examination or symptoms  
33  
34 were recruited as participants in this study. During this period, it is required by imaging workup  
35  
36 that DCBE as well as RWC-TVS were conducted in the patients with suspicious bowel  
37  
38 endometriosis. Institutional review board of Tianjin First Center Hospital approved the protocols  
39  
40 involved in this study before initialization of the study. All patients enrolled in this study signed  
41  
42 the written consent form. Inclusion criteria of this study were: suspicious deep pelvic  
43  
44 endometriosis, at reproductive age, gastrointestinal symptoms likely being caused by the bowel  
45  
46 endometriosis, desire for complete surgical endometriosis excision. Exclusion criteria of this  
47  
48 study were: precedent bilateral ovariectomy, radiological diagnosis of bowel endometriosis,  
49  
50  
51  
52  
53  
54  
55  
56  
57  
58  
59  
60

1  
2  
3 examination of barium radiology, colorectal surgery, hepatic or renal failure, suggestive  
4 intolerance for iodinated contrast medium, or refuse for DCBE or psychiatric disorders.  
5  
6

7  
8 Symptoms were investigated systematically throughout the study and were documented  
9 in a database. The existence of deep dyspareunia, dysmenorrheal, dyschezia, and non-menstrual  
10 pelvic was examined and the symptom intensities were evaluated of all patients by a 10 cm  
11 visual analog scale (VAS), in which left edge indicated no pain and right extremity presented  
12 maximum pain. Whether the following gastrointestinal symptoms were presented was  
13 determined: irritable bowel syndrome of diarrhea-predominance, passage of the stool mucus,  
14 irritable bowel syndrome of constipation-predominance, abdominal bloating rectal bleeding, and  
15 intestinal cramping. A questionnaire of symptom analogue scale was utilized to estimate every  
16 gastrointestinal symptom severity.  
17  
18  
19  
20  
21  
22  
23  
24  
25  
26  
27  
28

29 The results of DCBE and RWC-TVS were compared to pathologic and surgical findings.  
30 The radiologists conducting DCBE as well as the gynecologists conducting TVS were both  
31 blinded to results of others. They were also blinded to clinical data, and only knew that the  
32 intestinal endometriosis presence was suspected. All the patients underwent laparoscopy, which  
33 was within one month after completion of investigations for diagnosis. Intestinal endometriosis  
34 disease was defined by the minimum infiltration of muscularis propria. Endometriosis foci on  
35 bowel serosa were peritoneal instead of bowel endometriosis. This study investigated the  
36 accurateness of RWC-TVS and DCBE in assessing the bowel endometriosis presence, evaluating  
37 the number and the size for nodules of bowel endometriosis as well as determining the existence  
38 of peritoneal endometriosis with only intestinal serosa being infiltrated.  
39  
40  
41  
42  
43  
44  
45  
46  
47  
48  
49  
50  
51  
52

### 53 **Technique of rectal water contrast transvaginal ultrasound**

54  
55  
56  
57  
58  
59  
60

1  
2  
3 Two physicians conducted all of the examinations in line with a standardized procedure<sup>10</sup>. RWC-  
4  
5 TVS was conducted by utilizing a Voluson E6 machine connected with a transvaginal transducer.  
6  
7  
8 Once the transducer was placed in the vagina, a 6-mm flexible catheter was inserted in rectal  
9  
10 lumen with a distance of 15 cm to the anus through the anus. To facilitate of the catheter passage,  
11  
12 a gel containing lidocaine was applied. A 50 mL syringe connected with the catheter and warm  
13  
14 saline solution then was injected to the rectum as well as the sigmoid with ultrasonic control. The  
15  
16 saline solution amount for showing the rectosigmoid varied from 100 to 350 mL, based on the  
17  
18 intestinal wall dispensability. One hundred ml saline solution was slowly and continuously  
19  
20 instilled at the procedure beginning, and the rest solution was instilled if requested by ultrasound.  
21  
22  
23 When the saline solution wasn't being infused during the ultrasound, Klemmer forceps attached  
24  
25 to the catheter was placed to prevent backflow in the catheter. No significant saline solution  
26  
27 leakage in the space was seen between catheter and anus. Before, during as well as after saline  
28  
29 injection, images were taken. Bowel endometriosis was shown ultrasonographically as solid,  
30  
31 hypoechoic, nodular lesions, adjacent to or penetrating the wall of the intestine. Hyperechoic foci  
32  
33 sometimes may present inside the lesion. Intestinal distension permits defining the intestinal  
34  
35 nodule limits and various layers within rectal wall in particular so as to estimate infiltration depth.  
36  
37 The submucosa and intestinal serosa are hyperechoic. Two layers in muscularis propria were  
38  
39 shown as strips with hypoechoic divided by a thin hyperechoic line. Muscularis mucosa appears  
40  
41 hypoechoic, and interface connecting the lumen and mucosal layer appears hyperechoic (Figure  
42  
43 1). Infiltration of rectal endometriosis was verified by that hypoechoic nodules penetrate the wall  
44  
45 of the intestine and in general muscularis mucosa was thickened by the hypoechoic nodules. Two  
46  
47 different ultrasound signs were normally used to define this condition (Figure 2).  
48  
49  
50  
51  
52  
53  
54

## 55 DCBE

56  
57  
58  
59  
60

1  
2  
3 All procedures by DCBE were conducted by a motorized and tilting table to perform radiological  
4 and fluoroscopic examination. For preparation, patients kept low-residue diet in a 1-day period  
5 before the examination in order to keep enteric content fluid. Then examination was conducted  
6 after the intramuscular administration of 20 mg (1 ampoule) scopolamine to induce colonic  
7 hypotonia. The presence of bowel endometriosis was diagnosed on DCBE when the bowel  
8 lumen was narrowed at any level from the sigmoid to the anus (extrinsic mass effect) in  
9 association with crenulation of the mucosa and/or speculation of contour (Figure  
10  
11  
12  
13  
14  
15  
16  
17  
18  
19

### 20 3).Examinations tolerability

21  
22 Immediately after every examination, patients rated the level of discomfort experienced during  
23 DCBE as well as RWC-TVS using a 10 cm VAS. Mild pain was scored <2 by moderate pain  
24 was scored  $\geq 2$ , and severe pain was scored >5.  
25  
26  
27  
28

### 29 Operation and histological assessment

30  
31 The surgeons carefully examined the results and images by DCBE and RWC-TVS prior to the  
32 laparoscopy. Although the rectosigmoid endometriosis diagnosis and treatment were dependent  
33 on the laparoscopic findings, operational procedures were conducted through laparoscope  
34 evaluated by the team composed of colorectal as well as gynecological surgeons with lots of  
35 experience in the bowel endometriosis and pelvic treatment. At all cases, the rectum and sigmoid  
36 colon were examined systematically to confirm the endometriosis lesion presence after enough  
37 adhesiolysis. The lesions of bowel endometriosis were removed via intestinal resection, which  
38 happened in the cases of a single lesion with >3 cm diameter or infiltrating 50% or more of the  
39 intestinal wall circumference, or at least three lesions infiltrating muscular layer. In all the other  
40 bowel endometriosis cases, disk resection of partial-thickness or full-thickness was conducted.  
41  
42  
43  
44  
45  
46  
47  
48  
49  
50  
51  
52  
53  
54  
55  
56  
57  
58  
59  
60  
Excision by shaving was conducted for intestinal lesions with simply the serosal layer of bowel

1  
2  
3 wall infiltrated. All of the visible lesions that were suspicious endometriosis were removed and  
4  
5 then sent for histology examination according to our clinical protocol.  
6  
7

8 The excised specimens were assessed by histology, and the infiltration depth of  
9  
10 endometriosis nodules of bowel wall was assessed. In nodulectomy cases, specimens were  
11  
12 oriented macroscopically along intestinal wall (from serosa to the mucosa) and cut to macro  
13  
14 sections with two mm thickness. From every macrosection tissue, blocks at 1.5 cm length were  
15  
16 attained in various numbers based on the lesion size, and sections at 5  $\mu$ m were attained for  
17  
18 microscopically evaluation from each tissue. In bowel resection cases specimens were  
19  
20 longitudinally opened through their entire lengths. Two mm bowel wall longitudinal bands were  
21  
22 dissected. The bands were embedded in the tissue blocks, and sections of 5  $\mu$ m were attained for  
23  
24 evaluation by microscopy.  
25  
26  
27  
28

### 29 **Statistical analysis**

30  
31 Sensitivity, specificity, negative predictive value (NPV), and positive predictive value (PPV)  
32  
33 were assessed for both RWC-TVS and DCBE. Each test diagnostic value was also measured by  
34  
35 negative likelihood ratio (LR-) and positive likelihood ratio (LR+). Efficacy parameters at 95%  
36  
37 confidence intervals were calculated. McNemar's test using Yates continuity correction was  
38  
39 utilized to compare accuracy of RWC-TVS and DCBE in the intestinal endometriosis diagnosis.  
40  
41 McNemar's test was utilized to compare the patient number in which the rectosigmoid nodule  
42  
43 numbers were identified by RWC-TVS and DCBE correctly. Accuracy of nodule size assessment  
44  
45 with these imaging methods was evaluated by subtracting nodule size assessed by these methods  
46  
47 from the nodule size assessed by histology. Nonparametric Mann-Whitney test was applied to  
48  
49 compare pain intensity of patients with RWC-TVS or DCBE. Chi-square test was utilized to  
50  
51 compare pain type (mild pain, moderate pain or severe pain). Spearman's rank correlation  
52  
53  
54  
55  
56  
57  
58  
59  
60

1  
2  
3 coefficient was applied to define whether correlation between pain intensity of patients  
4  
5 experiencing these two techniques exists. SPSS software was used for data analysis.  $P < 0.05$  was  
6  
7 considered as statistically significant.  
8  
9

## 10 11 12 **Results**

### 13 **Study population**

14  
15  
16  
17  
18  
19  
20  
21  
22  
23  
24  
25  
26  
27  
28  
29  
30  
31  
32  
33  
34  
35  
36  
37  
38  
39  
40  
41  
42  
43  
44  
45  
46  
47  
48  
49  
50  
51  
52  
53  
54  
55  
56  
57  
58  
59  
60  
Totally, 198 patients participated in this study and all underwent surgeries were involved in the  
study (Figure 4). The major demographic characteristics in this study were displayed in Table 1.  
The pain intensities as well as gastrointestinal symptoms were shown in Table 2.

Surgery together with histology verified that bowel endometriosis nodules existed in 110  
patients (55.6%). Endometriosis lesions infiltrated intestinal serosa among 28 patients. The  
remaining 82 patients carried pelvic endometriosis yet no evidence for intestinal lesions. The  
largest nodules of intestinal endometriosis were found located on anterior sigmoid of 53 patients,  
on upper anterior rectum of 30 patients, at rectosigmoid junction of 20 patients, on ileum of 5  
patients and on caecum of 2 patients. Multifocal disease was found in 17 patients who had two  
nodules affecting the bowel. 15 cases were found to have those endometriosis lesions that only  
infiltrate intestinal serosa on anterior sigmoid, 5 cases were on rectum in and 3 cases were at  
rectosigmoid junction. The mean ( $\pm$ SD) lengths of bowel segments that were resected were  $12.2$   
 $\pm 3.6$  cm. The endometriosis diagnosis was verified in all excised nodules by histology.  
Moreover, it showed that 62 patients (56.4 %) had deepest endometriosis nodules infiltrating the  
muscularis propria, 31 patients (28.2%) with the submucosa infiltrated and 17 patients (15.5%)  
with the mucosa infiltrated.

### 55 **Accuracy of DCBE and RWC-TVS in the bowel endometriosis diagnosis**



1  
2  
3 Table 3 described the accuracy, specificity, sensitivity, NPV, PPV, LR- and LR+ of RWC-TVS  
4 and DCBE in the bowel endometriosis diagnosis. DCBE identified 106 among 110 patients of  
5 bowel endometriosis (96.4%). 4 patients with the rectum muscularis propria infiltrated by  
6 endometriosis nodules were not defined, and the rectum muscularis propria were removed using  
7 partial-thickness nodulectomy. RWC-TVS identified 97 among 110 patients of intestinal  
8 endometriosis (88.2%). RWC-TVS was not able to identify 3 rectal nodules, 4 ileal lesions, 2  
9 cecal lesions, and 4 sigmoid nodules infiltrating muscularis propria. Moreover, we found 4 of the  
10 patients with large and bilateral endometriosis in ovarian cysts, and they may hamper the  
11 intestinal nodules identification. There were 2 false positives of RWC-TVS, where endometriosis  
12 nodules in rectovagina were defined to infiltrate rectum muscularis.  
13  
14  
15  
16  
17  
18  
19  
20  
21  
22  
23  
24  
25  
26

27 Surgery verified the rectovaginal nodule presence but didn't reveal rectal muscularis  
28 infiltration. The specificity, sensitivity, NPV, PPV, LR-, LR+, as well as accuracy of these two  
29 techniques in the intestinal endometriosis diagnosis were presented in Table 3. McNemar's test  
30 displayed that no significant differences were found in accuracy of these two techniques for  
31 bowel endometriosis diagnosis (P=0.109). Histology examination showed that in 53 patients  
32 endometriosis infiltrated rectosigmoid colon submucosa or mucosa. DCBE correctly defined the  
33 infiltration depth in 27 of the patients (50.9%), while RWC-TVS correctly defined the infiltration  
34 depth in 20 of the patients (37.7%) (P=0.126). All other nodules infiltrated the mucosa or  
35 submucosa by histology was identified to only reach muscularis at RWC-TVS and DCBE. Both  
36 of these two techniques did not have false-positive cases of submucosal or mucosal infiltration  
37 diagnosis. Both RWC-TVS and DCBE underestimated the endometriosis nodules size.  
38 Nevertheless, underestimation was smaller for DCBE than for RWC-TVS (Table 4).  
39  
40  
41  
42  
43  
44  
45  
46  
47  
48  
49  
50  
51  
52  
53  
54  
55  
56  
57  
58  
59  
60

1  
2  
3 Additionally, in both techniques underestimation was larger for the nodules with the diameter  $\geq$   
4  
5 30 mm.  
6  
7

### 8 **Tolerability of RWC-TVS and DCBE**

9  
10 DCBE was conducted safely in all patients. During both examinations, all patients were able to  
11  
12 tolerate intestinal distension therefore no procedure interruption occurred. However, the pain  
13  
14 intensity experienced in the course of DCBE was higher than that was experienced in the course  
15  
16 of RWC-TVS (Table 5). A positive correlation was detected between the pain intensity  
17  
18 experienced by patients throughout these two examinations (Spearman correlation  
19  
20 coefficient=0.575,  $p < 0.001$ ).  
21  
22  
23  
24  
25  
26

### 27 **Discussion**

28  
29 This study is the first time to demonstrate that RWC-TVS and DCBE have comparable accuracy  
30  
31 in bowel endometriosis diagnosis. Both DCBE and RWC-TVS underestimated the nodule size of  
32  
33 bowel endometriosis, while underestimation was less for DCBE than for RWC-TVS, especially  
34  
35 for the nodules with largest diameters  $\geq 30$  mm as shown in Table 4. Choosing ultrasonic  
36  
37 technique often depends on the ultrasonographer experience rather than superiority evidence of  
38  
39 one technique in comparison to others. In fact, TVS are required to be conducted by highly  
40  
41 skillful professionals, and it was estimated recently that it requires conduction of about 40 cases  
42  
43 <sup>17</sup> for the learning curve of an accurate deep pelvic endometriosis diagnosis by TVS.  
44  
45  
46 Consequently, it is kind of difficult to attain such extent of experience for the ultrasonographers  
47  
48 in small hospitals. Main advantage for DCBE is that, with the entire colon retrograde distension,  
49  
50 it provides the complete overview for the entire colon <sup>18</sup>. The aim in the current study was to  
51  
52 compare to RWC-TVS and also right colon endometriosis lesions are outside of the transvaginal  
53  
54  
55  
56  
57  
58  
59  
60

1  
2  
3 approach field view. The reason that RWC-TVS was selected to compare to DCBE was because  
4  
5 of the personal experience and the common bowel distension criterion with fluid. The authors  
6  
7 subsequently confirmed usefulness of this technique in large series. Additionally, other authors  
8  
9 have confirmed that opacification and intestinal distension with ultrasound gel are helpful for  
10  
11 visualizing nodules of rectosigmoid endometriosis<sup>19 20</sup>.

12  
13  
14  
15 Previous studies suggested the reliability of TVS for rectosigmoid endometriosis  
16  
17 diagnosis. The TVS sensitivity for rectosigmoid endometriosis detection is from 91 to 98%, the  
18  
19 specificity is from 97 to 100%, the PPV is from 97 to 100% and the NPV is from 87 to 98%<sup>21-24</sup>.  
20  
21 Recently, RWC-TVS was developed in order to facilitate intestinal lesion identification in  
22  
23 patients of rectovaginal endometriosis as well as to determine endometriosis infiltration depth in  
24  
25 intestinal wall<sup>25</sup>. TVS was utilized in patients of bowel endometriosis extensively recently,  
26  
27 though little results are available for DCBE use of these patients. This study verified that RWC-  
28  
29 TVS and DCBE have comparable accuracy in bowel endometriosis diagnosis. Both of these two  
30  
31 techniques estimated the rectosigmoid nodule length precisely, while DCBE was even accurate  
32  
33 than RWC-TVS for measuring the distance from the anal verge to the endometriosis nodule<sup>9</sup>.  
34  
35 Visibly, the extensive experiences of the gynecologist and the radiologist in RWC-TVS and  
36  
37 DCBE, may have affected the accurateness of the techniques in bowel endometriosis diagnosis<sup>24</sup>  
38  
39<sup>26</sup>. The findings could be explained by that when conducting imaging techniques, especially  
40  
41 RWC-TVS, it may be difficult to choose the plane where the irregular nodule of endometriosis  
42  
43 has the longest diameter. Nevertheless, difference between the longest diameter and the  
44  
45 estimated nodule size as assessed by histopathology was very small and also, most of the times it  
46  
47 doesn't seem this difference influence the choice for bowel resection or nodulectomy as  
48  
49 treatment<sup>27</sup>. Importantly, the patients tolerated RWC-TVS better compared they did with DCBE.  
50  
51  
52  
53  
54  
55  
56  
57  
58  
59  
60

1  
2  
3 The findings are consistent with those previous studies indicating the accurateness of TVS for  
4  
5  
6  
7  
8  
9  
10  
11  
12  
13  
14  
15  
16  
17  
18  
19  
20  
21  
22  
23  
24  
25  
26  
27  
28  
29  
30  
31  
32  
33  
34  
35  
36  
37  
38  
39  
40  
41  
42  
43  
44  
45  
46  
47  
48  
49  
50  
51  
52  
53  
54  
55  
56  
57  
58  
59  
60

The findings are consistent with those previous studies indicating the accurateness of TVS for bowel endometriosis diagnosis and its comparison of TVS to the other techniques like rectal endoscopic ultrasound and MRI <sup>11 28-30</sup>.

11  
12  
13  
14  
15  
16  
17  
18  
19  
20  
21  
22  
23  
24  
25  
26  
27  
28  
29  
30  
31  
32  
33  
34  
35  
36  
37  
38  
39  
40  
41  
42  
43  
44  
45  
46  
47  
48  
49  
50  
51  
52  
53  
54  
55  
56  
57  
58  
59  
60

Researchers have questioned potential benefits by the introduction of aqueous contrast medium into rectum through TVS. TVS is dependent on the operator and it's possible that differences observed for the accurateness by the technique are caused by the ultrasonographer experience conducting the procedure <sup>31</sup>. However, application of intestinal aqueous contrast into TVS could facilitate the rectosigmoid lesion identification. Other methods have been suggested for improving the TVS accuracy in deep endometriosis detection, including using large amount transmission gel for ultrasound (12 mL) in probe cover or sonovaginography <sup>32</sup>. Till now, there is no study has demonstrated any ultrasonic technique better than others in deep endometriosis diagnosis.

31  
32  
33  
34  
35  
36  
37  
38  
39  
40  
41  
42  
43  
44  
45  
46  
47  
48  
49  
50  
51  
52  
53  
54  
55  
56  
57  
58  
59  
60

TVS was suggested to be considered as the first investigation for patients of deep endometriosis and TVS allows for intestinal lesions diagnosis <sup>24</sup>. Other investigations including DCBE, MDCT-e, RWC-TVS, rectal endoscopic ultrasound and MRI should be utilized to determine intestinal endometriosis characteristics, such as the nodules size and number, the intestinal wall infiltration depth of nodules and the stenosis degree of bowel lumen <sup>33-35</sup>. RWC-TVS has some advantages over other techniques. For example, RWC-TVS is less expensive than MRI and MDCT-e and the required equipment for RWC-TVS is usually available to the gynecologists, who are typically involved in endometriosis patient management. Recently a study showed that RWC-TVS permit the stenosis degree estimation of intestinal lumen which is caused by the endometriosis <sup>36</sup>. Unfortunately, the current study did not examine this parameter, which is a limitation in our investigation. Theoretically, RWC-TVS should also permit

1  
2  
3 determination of the disease extent along longitudinal axis of the intestine. Apparently, RWC-  
4  
5 TVS could not determine intestinal nodule presence located in the proximal of sigmoid because  
6  
7 the lesions are outside of the view field in TVS.  
8  
9

10 The current study has several limitations. First, experience of ultrasonographer  
11  
12 conducting RWC-TVS may affect the accuracy of the techniques in bowel endometriosis  
13  
14 diagnosis. Second, the surgeons know the findings by RWC-TVS and DCBE. In an ideal study,  
15  
16 surgeons should be blind to the findings of pre-operative investigations, but this theoretical  
17  
18 design is unethical clinically, for diagnostic imaging would facilitate the nodule identification of  
19  
20 intestinal endometriosis during surgery. Moreover, the knowledge of the pre-operative  
21  
22 investigation findings only helps the surgeons to identify actually presenting endometriosis  
23  
24 nodules. Third, DCBE and RWC-TVS didn't estimate the circumference percentage of intestinal  
25  
26 wall that was infiltrated by the endometriosis, a criterion for choosing between bowel resection  
27  
28 and nodulectomy. Hence, patients scheduling for nodulectomy based on the findings of RWC-  
29  
30 TVS and DCBE should be aware of that the bowel resection may be required to excise the  
31  
32 intestinal endometriosis completely. At last, the study was also limited in that we didn't assess  
33  
34 the accuracy of the two techniques in estimating the distance between the lower margin of the  
35  
36 lesion and the anal verge, which should be addressed in our follow up study. Future studies  
37  
38 would also investigate whether RWC-TVS and DCBE can estimate the intestinal circumference  
39  
40 percentage by endometriosis infiltration reliably. DCBE might still play a role for diagnosis  
41  
42 workup in patients of suspicious bowel endometriosis. When RWC-TVS or TVS shows bowel  
43  
44 muscular is infiltrated by big intestinal nodules, the bowel resection could probably be conducted  
45  
46 without further examinations unless surgeons want to exclude the intestinal lesions close to  
47  
48 sigmoid. When ultrasound shows one bowel nodule which might be removed by using  
49  
50  
51  
52  
53  
54  
55  
56  
57  
58  
59  
60

1  
2  
3 nodulectomy, DCBE is better to be utilized to exclude other intestinal nodule presence in order  
4  
5 to plan the operating procedure with colorectal surgeon as well as the patient adequately.  
6  
7

8 This study demonstrated RWC-TVS as a very reliable technique to determine the bowel  
9  
10 endometriosis presence and extent and it has similar accuracy to that of DCBE. Nevertheless,  
11  
12 RWC-TVS may underestimate multiple bowel nodule presence sometimes, and be conducted  
13  
14 easily in the ambulatory setting; also it is easily tolerated by the patients. It is hypothesized to  
15  
16 combine DCBE and TVS to attain a complete bowel preoperative assessment so as to provide  
17  
18 adequate counseling to the patients and the most suitable surgical treatment in one step.  
19  
20  
21  
22  
23

#### 24 **Data sharing statement**

25  
26 All data generated or analyzed during this study are included in this published article. No  
27  
28 additional unpublished data.  
29  
30  
31  
32  
33

#### 34 **Author's contribution**

35  
36 Collected the data: Jipeng Jiang, Ying Liu, Kun Wang, Xixiang Wu; Designed the study and  
37  
38 wrote the manuscript: Ying Tang; All authors approved the final submission.  
39  
40  
41  
42

#### 43 **Funding**

44  
45 None.  
46  
47  
48  
49

#### 50 **Acknowledgments**

51  
52 None.  
53  
54  
55  
56  
57  
58  
59  
60

## Conflict of interests

The authors declare no conflict of interests.

## References

1. Remorgida V, Ferrero S, Fulcheri E, et al. Bowel endometriosis: presentation, diagnosis, and treatment. *Obstet Gynecol Surv* 2007;62(7):461-70. doi: 10.1097/01.ogx.0000268688.55653.5c
2. Remorgida V, Ragni N, Ferrero S, et al. The involvement of the interstitial Cajal cells and the enteric nervous system in bowel endometriosis. *Hum Reprod* 2005;20(1):264-71. doi: 10.1093/humrep/deh568
3. Ferrero S, Biscaldi E, Morotti M, et al. Multidetector computerized tomography enteroclysis vs. rectal water contrast transvaginal ultrasonography in determining the presence and extent of bowel endometriosis. *Ultrasound Obstet Gynecol* 2011;37(5):603-13. doi: 10.1002/uog.8971
4. Menada MV, Remorgida V, Abbamonte LH, et al. Transvaginal ultrasonography combined with water-contrast in the rectum in the diagnosis of rectovaginal endometriosis infiltrating the bowel. *Fertil Steril* 2008;89(3):699-700. doi: 10.1016/j.fertnstert.2007.07.1336
5. Abrao MS, Goncalves MO, Dias JA, Jr., et al. Comparison between clinical examination, transvaginal sonography and magnetic resonance imaging for the diagnosis of deep endometriosis. *Hum Reprod* 2007;22(12):3092-7. doi: 10.1093/humrep/dem187
6. Podgaec S, Abrao MS, Dias JA, Jr., et al. Endometriosis: an inflammatory disease with a Th2 immune response component. *Hum Reprod* 2007;22(5):1373-9. doi: 10.1093/humrep/del516
7. Leone Roberti Maggiore U, Biscaldi E, Vellone GV, et al. Magnetic resonance enema versus rectal water contrast transvaginal ultrasonography in the diagnosis of rectosigmoid endometriosis. *Ultrasound Obstet Gynecol* 2016 doi: 10.1002/uog.15934

- 1  
2  
3 8. Ferrero S. Endometriosis: Modern management of an ancient disease. *Eur J Obstet Gynecol Reprod*  
4  
5 *Biol* 2016 doi: 10.1016/j.ejogrb.2016.12.036  
6  
7
- 8 9. Ferrero S, Biscaldi E, Vellone VG, et al. Computed tomographic colonography versus rectal-water  
9  
10 contrast transvaginal ultrasonography in the diagnosis of rectosigmoid endometriosis: a pilot  
11  
12 study. *Ultrasound Obstet Gynecol* 2016 doi: 10.1002/uog.15905  
13
- 14 10. Guerriero S, Condous G, van den Bosch T, et al. Systematic approach to sonographic evaluation of  
15  
16 the pelvis in women with suspected endometriosis, including terms, definitions and  
17  
18 measurements: a consensus opinion from the International Deep Endometriosis Analysis (IDEA)  
19  
20 group. *Ultrasound Obstet Gynecol* 2016;48(3):318-32. doi: 10.1002/uog.15955  
21  
22
- 23 11. Hudelist G, English J, Thomas AE, et al. Diagnostic accuracy of transvaginal ultrasound for non-  
24  
25 invasive diagnosis of bowel endometriosis: systematic review and meta-analysis. *Ultrasound*  
26  
27 *Obstet Gynecol* 2011;37(3):257-63. doi: 10.1002/uog.8858  
28  
29
- 30 12. Leone Roberti Maggiore U, Ferrero S, Mangili G, et al. A systematic review on endometriosis during  
31  
32 pregnancy: diagnosis, misdiagnosis, complications and outcomes. *Hum Reprod Update*  
33  
34 2016;22(1):70-103. doi: 10.1093/humupd/dmv045  
35  
36
- 37 13. Savelli L, Manuzzi L, Coe M, et al. Comparison of transvaginal sonography and double-contrast  
38  
39 barium enema for diagnosing deep infiltrating endometriosis of the posterior compartment.  
40  
41 *Ultrasound Obstet Gynecol* 2011;38(4):466-71. doi: 10.1002/uog.9072  
42  
43
- 44 14. Darwish B, Roman H. Surgical treatment of deep infiltrating rectal endometriosis: in favor of less  
45  
46 aggressive surgery. *Am J Obstet Gynecol* 2016;215(2):195-200. doi: 10.1016/j.ajog.2016.01.189  
47  
48
- 49 15. Darwish B, Roman H. Nerve Sparing and Surgery for Deep Infiltrating Endometriosis: Pessimism of  
50  
51 the Intellect or Optimism of the Will. *Semin Reprod Med* 2016 doi: 10.1055/s-0036-1597305  
52  
53
- 54 16. Roman H, Darwish B, Schmied R, et al. Combined vaginal-laparoscopic-transanal approach for  
55  
56 reducing bladder dysfunction after conservative surgery in large deep rectovaginal  
57  
58  
59  
60



- 1  
2  
3 endometriosis. *J Gynecol Obstet Biol Reprod (Paris)* 2016;45(6):546-8. doi:  
4 10.1016/j.jgyn.2015.11.010  
5  
6  
7  
8 17. Tammaa A, Fritzer N, Strunk G, et al. Learning curve for the detection of pouch of Douglas  
9 obliteration and deep infiltrating endometriosis of the rectum. *Hum Reprod* 2014;29(6):1199-  
10 204. doi: 10.1093/humrep/deu078  
11  
12  
13  
14  
15 18. Scardapane A, Bettocchi S, Lorusso F, et al. Diagnosis of colorectal endometriosis: contribution of  
16 contrast enhanced MR-colonography. *Eur Radiol* 2011;21(7):1553-63. doi: 10.1007/s00330-011-  
17 2079-5  
18  
19  
20  
21  
22 19. Loubeyre P, Copercini M, Frossard JL, et al. Pictorial review: rectosigmoid endometriosis on MRI with  
23 gel opacification after rectosigmoid colon cleansing. *Clin Imaging* 2012;36(4):295-300. doi:  
24 10.1016/j.clinimag.2011.09.010  
25  
26  
27  
28  
29 20. Loubeyre P, Petignat P, Jacob S, et al. Anatomic distribution of posterior deeply infiltrating  
30 endometriosis on MRI after vaginal and rectal gel opacification. *AJR Am J Roentgenol*  
31 2009;192(6):1625-31. doi: 10.2214/AJR.08.1856  
32  
33  
34  
35  
36 21. Bazot M, Lafont C, Rouzier R, et al. Diagnostic accuracy of physical examination, transvaginal  
37 sonography, rectal endoscopic sonography, and magnetic resonance imaging to diagnose deep  
38 infiltrating endometriosis. *Fertil Steril* 2009;92(6):1825-33. doi: 10.1016/j.fertnstert.2008.09.005  
39  
40  
41  
42  
43 22. Goncalves MO, Podgaec S, Dias JA, Jr., et al. Transvaginal ultrasonography with bowel preparation is  
44 able to predict the number of lesions and rectosigmoid layers affected in cases of deep  
45 endometriosis, defining surgical strategy. *Hum Reprod* 2010;25(3):665-71. doi:  
46 10.1093/humrep/dep433  
47  
48  
49  
50  
51  
52 23. Bazot M, Malzy P, Cortez A, et al. Accuracy of transvaginal sonography and rectal endoscopic  
53 sonography in the diagnosis of deep infiltrating endometriosis. *Ultrasound Obstet Gynecol*  
54 2007;30(7):994-1001. doi: 10.1002/uog.4070  
55  
56  
57  
58  
59  
60

- 1  
2  
3  
4  
5  
6  
7  
8  
9  
10  
11  
12  
13  
14  
15  
16  
17  
18  
19  
20  
21  
22  
23  
24  
25  
26  
27  
28  
29  
30  
31  
32  
33  
34  
35  
36  
37  
38  
39  
40  
41  
42  
43  
44  
45  
46  
47  
48  
49  
50  
51  
52  
53  
54  
55  
56  
57  
58  
59  
60
24. Piketty M, Chopin N, Dousset B, et al. Preoperative work-up for patients with deeply infiltrating endometriosis: transvaginal ultrasonography must definitely be the first-line imaging examination. *Hum Reprod* 2009;24(3):602-7. doi: 10.1093/humrep/den405
25. Valenzano Menada M, Remorgida V, Abbamonte LH, et al. Does transvaginal ultrasonography combined with water-contrast in the rectum aid in the diagnosis of rectovaginal endometriosis infiltrating the bowel? *Hum Reprod* 2008;23(5):1069-75. doi: 10.1093/humrep/den057
26. Ferrero S, Anserini P, Abbamonte LH, et al. Fertility after bowel resection for endometriosis. *Fertil Steril* 2009;92(1):41-6. doi: 10.1016/j.fertnstert.2008.04.070
27. Fritzer N, Tammaa A, Salzer H, et al. Dyspareunia and quality of sex life after surgical excision of endometriosis: a systematic review. *Eur J Obstet Gynecol Reprod Biol* 2014;173:1-6. doi: 10.1016/j.ejogrb.2013.10.032
28. Guerriero S, Ajossa S, Minguez JA, et al. Accuracy of transvaginal ultrasound for diagnosis of deep endometriosis in uterosacral ligaments, rectovaginal septum, vagina and bladder: systematic review and meta-analysis. *Ultrasound Obstet Gynecol* 2015;46(5):534-45. doi: 10.1002/uog.15667
29. Guerriero S, Ajossa S, Orozco R, et al. Accuracy of transvaginal ultrasound for diagnosis of deep endometriosis in the rectosigmoid: systematic review and meta-analysis. *Ultrasound Obstet Gynecol* 2016;47(3):281-9. doi: 10.1002/uog.15662
30. Hudelist G, Ballard K, English J, et al. Transvaginal sonography vs. clinical examination in the preoperative diagnosis of deep infiltrating endometriosis. *Ultrasound Obstet Gynecol* 2011;37(4):480-7. doi: 10.1002/uog.8935
31. Biscaldi E, Ferrero S, Remorgida V, et al. Rectosigmoid endometriosis with unusual presentation at magnetic resonance imaging. *Fertil Steril* 2009;91(1):278-80. doi: 10.1016/j.fertnstert.2008.02.131

- 1  
2  
3  
4 32. Guerriero S, Ajossa S, Gerada M, et al. "Tenderness-guided" transvaginal ultrasonography: a new  
5  
6 method for the detection of deep endometriosis in patients with chronic pelvic pain. *Fertil Steril*  
7  
8 2007;88(5):1293-7. doi: 10.1016/j.fertnstert.2006.12.060  
9
- 10 33. Philip CA, Bisch C, Coulon A, et al. Correlation between three-dimensional rectosonography and  
11  
12 magnetic resonance imaging in the diagnosis of rectosigmoid endometriosis: a preliminary study  
13  
14 on the first fifty cases. *Eur J Obstet Gynecol Reprod Biol* 2015;187:35-40. doi:  
15  
16 10.1016/j.ejogrb.2015.02.006  
17
- 18 34. Landi S, Barbieri F, Fiaccavento A, et al. Preoperative double-contrast barium enema in patients with  
19  
20 suspected intestinal endometriosis. *J Am Assoc Gynecol Laparosc* 2004;11(2):223-8.  
21  
22
- 23 35. Biscaldi E, Ferrero S, Leone Roberti Maggiore U, et al. Multidetector computerized tomography  
24  
25 enema versus magnetic resonance enema in the diagnosis of rectosigmoid endometriosis. *Eur J*  
26  
27 *Radiol* 2014;83(2):261-7. doi: 10.1016/j.ejrad.2013.10.010  
28  
29
- 30 36. Bergamini V, Ghezzi F, Scarperi S, et al. Preoperative assessment of intestinal endometriosis: A  
31  
32 comparison of transvaginal sonography with water-contrast in the rectum, transrectal  
33  
34 sonography, and barium enema. *Abdom Imaging* 2010;35(6):732-6. doi: 10.1007/s00261-010-  
35  
36 9610-z  
37  
38  
39  
40  
41  
42  
43  
44  
45  
46  
47  
48  
49  
50  
51  
52  
53  
54  
55  
56  
57  
58  
59  
60

## Figure Legends

**Fig. 1** RWC-TVS image showing a rectal endometriotic nodule thickening the muscularis mucosa (arrowhead). The rectal lumen is distended by saline solution (WC).

**Fig. 2** RWC-TVC image showing a rectal endometriotic nodule (arrow) with largest longitudinal diameter of 2.7 infiltrating the intestinal submucosa.

**Fig. 3** DCBE showing the effect of a large endometriotic nodule on the surface of the sigmoid colon.

**Fig. 4** Flow chart of the study.

**Table 1. Characteristics of study population**

|                                      | <b>n=198</b> |
|--------------------------------------|--------------|
| Age (year)                           | 32.7 ± 4.9   |
| BMI (kg/m <sup>2</sup> )             | 23.4 ± 2.4   |
| Previous surgery for endometriosis   | 78 (39.4)    |
| Previous live births                 | 53 (26.8)    |
| <b>Hormonal therapy</b>              |              |
| None                                 | 109 (55.1)   |
| Sequential oral contraceptive        | 44 (22.2)    |
| Norethisterone acetate               | 20 (10.1)    |
| Continuous oral contraceptive        | 13 (6.6)     |
| Norethisterone acetate and letrozole | 12 (6.1)     |

Values were expressed as n (%) or mean ± SD. BMI: body mass index

**Table 2. Intensity of pain and gastrointestinal symptoms of the study population (n=198)**

|                              | <b>Patients with symptom n (%)</b> | <b>Intensity (mean ± SD)</b> |
|------------------------------|------------------------------------|------------------------------|
| Dysmenorrhea                 | 171 (86.4)                         | 6.9 ± 1.6                    |
| Deep dyspareunia             | 127 (64.1)                         | 5.5 ± 1.5                    |
| Non-menstrual pelvic pain    | 145 (73.2)                         | 5.7 ± 1.2                    |
| Dyschezia                    | 93 (47.0)                          | 5.1 ± 1.9                    |
| Diarrhea-predominant IBS     | 63 (31.8)                          | 7.1 ± 2.1                    |
| Constipation-predominant IBS | 87 (43.9)                          | 7.6 ± 1.9                    |
| Passage of mucus             | 42 (21.2)                          | 6.1 ± 1.7                    |
| Rectal bleeding              | 19 (9.6)                           | 5.3 ± 1.1                    |
| Intestinal cramping          | 98 (49.5)                          | 6.8 ± 1.9                    |
| Abdominal bloating           | 119 (60.1)                         | 6.5 ± 2.2                    |

Values were expressed as n (%) or mean ± SD. Intensity of pain symptoms assessed using 10-cm visual analogue scale (VAS)

**Table 3. Diagnostic performance of rectal Ewater contrast transvaginal ultrasonography (RWC-TVS) and double-contrast barium enema (DCBE) in the diagnosis of bowel and rectosigmoid endometriosis (n=198)**

|                            | DCBE           | RWC-TVS        |
|----------------------------|----------------|----------------|
| <b>Bowel endometriosis</b> |                |                |
| Sensitivity                | 106/110 (96.4) | 97/110 (88.2)  |
| Specificity                | 97/97 (100)    | 95/97 (97.3)   |
| PPV                        | 106/106 (100)  | 97/99 (98.0)   |
| NPV                        | 97/101 (96.0)  | 95/108 (88.0)  |
| LR+                        | N/A            | 41.67          |
| LR-                        | 0.04           | 0.13           |
| Accuracy                   | 194/198 (98.0) | 183/198 (92.4) |

Values were expressed as n (%). Bowel endometriosis defined as disease infiltrating at least the muscularis propria. LR+ could not be calculated because there was no false positive. LR+, positive likelihood ratio; LR-, negative likelihood ratio; NPV, negative predictive value; PPV, positive predictive value.

McNemar's test with Yates continuity correction was used to compare the accuracy of DCBE and RWC-TVC.

**Table 4. Difference between size of the largest nodule estimated by imaging techniques and that measured on histopathology**

|                                            | Largest diameter on histology (mm, mean $\pm$ SD) | DCBE                                      |                                       | RWC-TVS                                   |                                       |
|--------------------------------------------|---------------------------------------------------|-------------------------------------------|---------------------------------------|-------------------------------------------|---------------------------------------|
|                                            |                                                   | Mean difference (mm, 95% CI) <sup>a</sup> | Limits of agreement (mm) <sup>b</sup> | Mean difference (mm, 95% CI) <sup>a</sup> | Limits of agreement (mm) <sup>b</sup> |
| All nodules (n=110)                        | 28.5 $\pm$ 6.9                                    | 1.62 (0.98-2.23)                          | -4.32 to 7.43                         | 2.27 (1.23-3.43)                          | -3.12 to 4.23                         |
| Nodules with diameter <30 mm (n= 77)       | 22.7 $\pm$ 4.1                                    | 0.73 (0.11-1.32)                          | -2.92 to 5.37                         | 1.65 (0.81-2.76)                          | -2.32 to 3.78                         |
| Nodules with diameter $\geq$ 30 mm (n= 33) | 35.9 $\pm$ 4.2                                    | 3.01 (1.96-4.15)                          | -5.56 to 8.34                         | 3.91 (2.34-5.95)                          | -5.12 to 8.91                         |

RWC-TVS, rectal water contrast transvaginal ultrasonography; DCBE, double-contrast barium enema. **a.** Mean difference calculated by subtracting size of size of nodule by imaging technique from size of nodule measured on histology. **b.** Limits of agreement calculated as mean difference  $\pm$  2 SDs of the difference.



**Table 5. Intensity of pain experienced by 198 patients during rectal water contrast transvaginal ultrasonography (RWC-TVS) and double-contrast barium enema (DCBE) as assessed on a 10-cm visual analog scale (VAS)**

| <b>Intensity of pain</b>                        | <b>RWC-TVS</b> | <b>DCBE</b>   | <b>p value</b> |
|-------------------------------------------------|----------------|---------------|----------------|
| Overall intensity of pain (mean $\pm$ SD)       | 3.9 $\pm$ 1.8  | 4.9 $\pm$ 2.3 | < 0.001        |
| Categorical intensity of pain (n (%))           |                |               | < 0.001        |
| Mild pain (VAS score < 2)                       | 30 (15.2)      | 9 (4.5)       |                |
| Moderate pain (VAS score $\geq$ 2 and $\leq$ 5) | 119 (60.1)     | 80 (40.4)     |                |
| Severe pain (VAS score > 5)                     | 49 (24.7)      | 109 (55.1)    |                |

The Mann-Whitney test was used to compare the intensity of pain. The chi-square test was used to compare the type of pain.

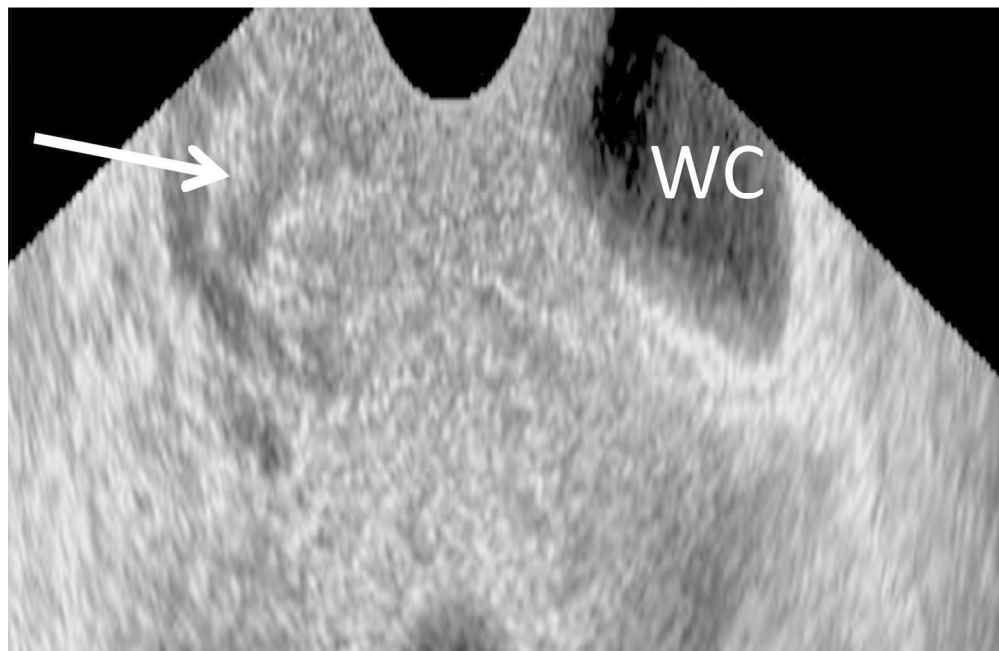

Figure 1

154x100mm (300 x 300 DPI)

Review only

1  
2  
3  
4  
5  
6  
7  
8  
9  
10  
11  
12  
13  
14  
15  
16  
17  
18  
19  
20  
21  
22  
23  
24  
25  
26  
27  
28  
29  
30  
31  
32  
33  
34  
35  
36  
37  
38  
39  
40  
41  
42  
43  
44  
45  
46  
47  
48  
49  
50  
51  
52  
53  
54  
55  
56  
57  
58  
59  
60

1  
2  
3  
4  
5  
6  
7  
8  
9  
10  
11  
12  
13  
14  
15  
16  
17  
18  
19  
20  
21  
22  
23  
24  
25  
26  
27  
28  
29  
30  
31  
32  
33  
34  
35  
36  
37  
38  
39  
40  
41  
42  
43  
44  
45  
46  
47  
48  
49  
50  
51  
52  
53  
54  
55  
56  
57  
58  
59  
60

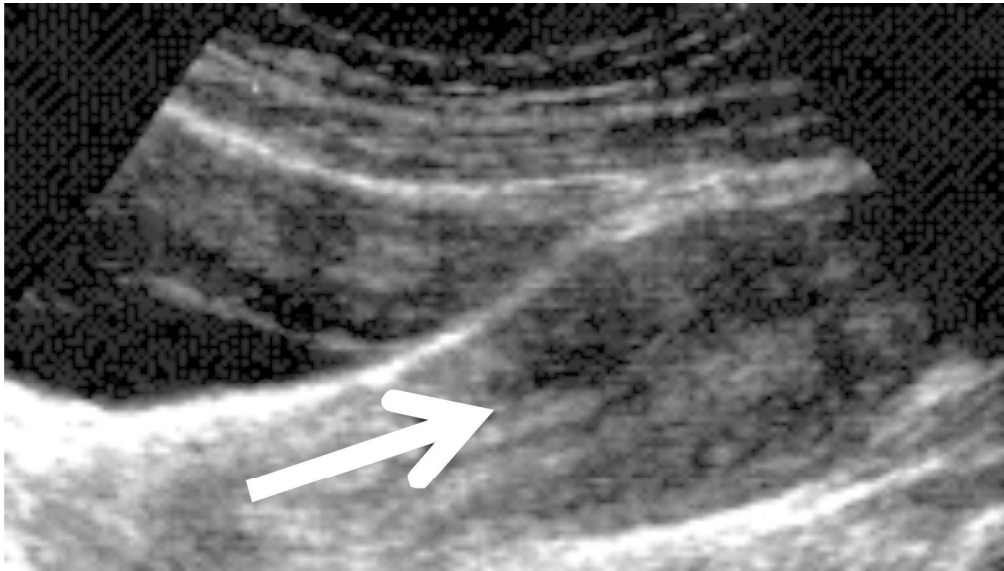

Figure 2

172x97mm (300 x 300 DPI)

review only

1  
2  
3  
4  
5  
6  
7  
8  
9  
10  
11  
12  
13  
14  
15  
16  
17  
18  
19  
20  
21  
22  
23  
24  
25  
26  
27  
28  
29  
30  
31  
32  
33  
34  
35  
36  
37  
38  
39  
40  
41  
42  
43  
44  
45  
46  
47  
48  
49  
50  
51  
52  
53  
54  
55  
56  
57  
58  
59  
60

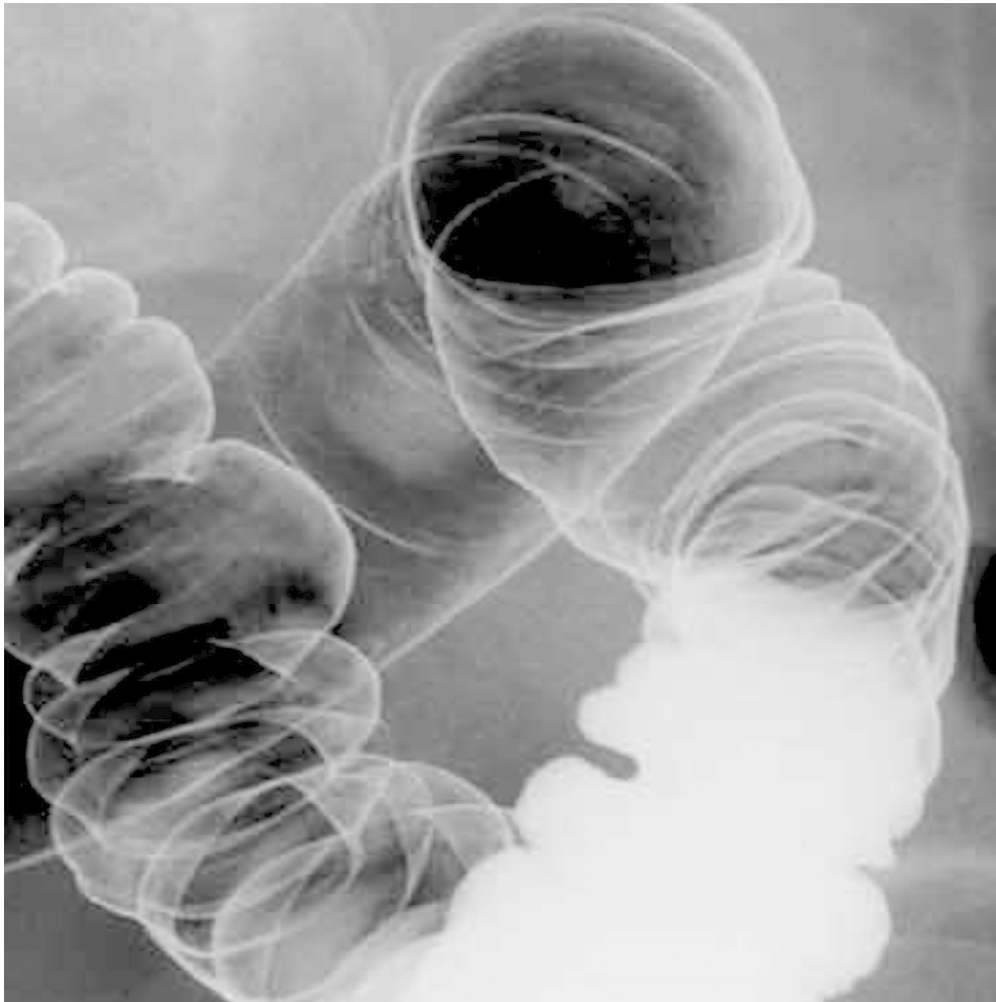

Figure 3

127x127mm (300 x 300 DPI)

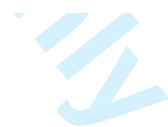

1  
2  
3  
4  
5  
6  
7  
8  
9  
10  
11  
12  
13  
14  
15  
16  
17  
18  
19  
20  
21  
22  
23  
24  
25  
26  
27  
28  
29  
30  
31  
32  
33  
34  
35  
36  
37  
38  
39  
40  
41  
42  
43  
44  
45  
46  
47  
48  
49  
50  
51  
52  
53  
54  
55  
56  
57  
58  
59  
60

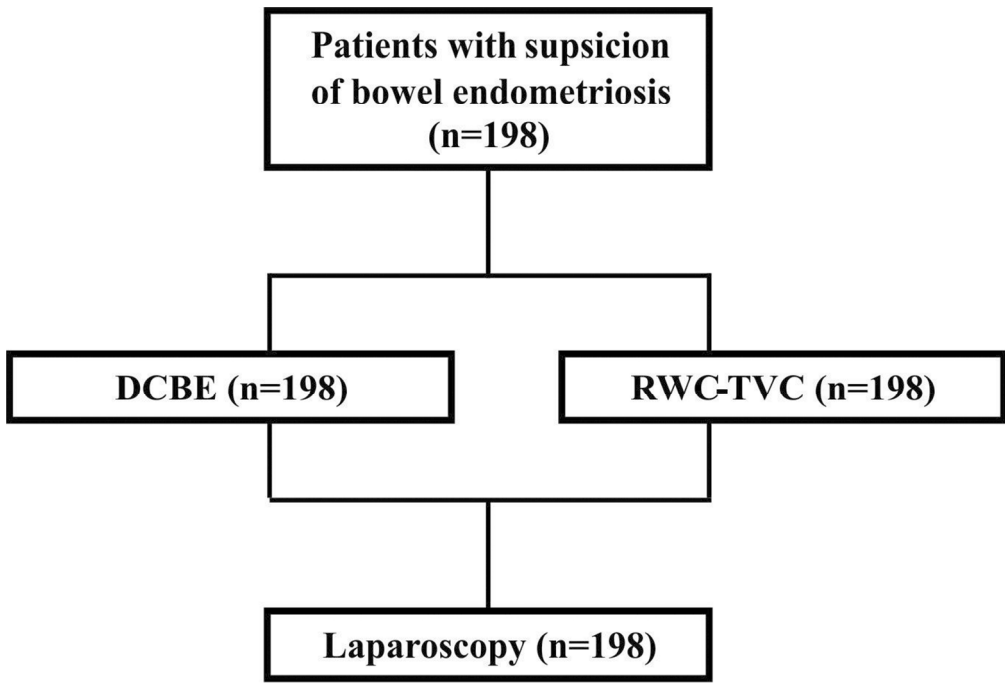

Figure 4

115x77mm (300 x 300 DPI)

view only

| Section & Topic          | No  | Item                                                                                                                                                   | Reported on page # |
|--------------------------|-----|--------------------------------------------------------------------------------------------------------------------------------------------------------|--------------------|
| <b>TITLE OR ABSTRACT</b> |     |                                                                                                                                                        |                    |
|                          | 1   | Identification as a study of diagnostic accuracy using at least one measure of accuracy (such as sensitivity, specificity, predictive values, or AUC)  | 1                  |
| <b>ABSTRACT</b>          |     |                                                                                                                                                        |                    |
|                          | 2   | Structured summary of study design, methods, results, and conclusions (for specific guidance, see STARD for Abstracts)                                 | 2                  |
| <b>INTRODUCTION</b>      |     |                                                                                                                                                        |                    |
|                          | 3   | Scientific and clinical background, including the intended use and clinical role of the index test                                                     | 4                  |
|                          | 4   | Study objectives and hypotheses                                                                                                                        | 5                  |
| <b>METHODS</b>           |     |                                                                                                                                                        |                    |
| <i>Study design</i>      | 5   | Whether data collection was planned before the index test and reference standard were performed (prospective study) or after (retrospective study)     | 5                  |
| <i>Participants</i>      | 6   | Eligibility criteria                                                                                                                                   | 5                  |
|                          | 7   | On what basis potentially eligible participants were identified (such as symptoms, results from previous tests, inclusion in registry)                 |                    |
|                          | 8   | Where and when potentially eligible participants were identified (setting, location and dates)                                                         |                    |
|                          | 9   | Whether participants formed a consecutive, random or convenience series                                                                                |                    |
| <i>Test methods</i>      | 10a | Index test, in sufficient detail to allow replication                                                                                                  | 6                  |
|                          | 10b | Reference standard, in sufficient detail to allow replication                                                                                          |                    |
|                          | 11  | Rationale for choosing the reference standard (if alternatives exist)                                                                                  |                    |
|                          | 12a | Definition of and rationale for test positivity cut-offs or result categories of the index test, distinguishing pre-specified from exploratory         |                    |
|                          | 12b | Definition of and rationale for test positivity cut-offs or result categories of the reference standard, distinguishing pre-specified from exploratory |                    |
|                          | 13a | Whether clinical information and reference standard results were available to the performers/readers of the index test                                 |                    |
|                          | 13b | Whether clinical information and index test results were available to the assessors of the reference standard                                          |                    |
| <i>Analysis</i>          | 14  | Methods for estimating or comparing measures of diagnostic accuracy                                                                                    | 9                  |
|                          | 15  | How indeterminate index test or reference standard results were handled                                                                                |                    |
|                          | 16  | How missing data on the index test and reference standard were handled                                                                                 |                    |
|                          | 17  | Any analyses of variability in diagnostic accuracy, distinguishing pre-specified from exploratory                                                      |                    |
|                          | 18  | Intended sample size and how it was determined                                                                                                         |                    |
| <b>RESULTS</b>           |     |                                                                                                                                                        |                    |
| <i>Participants</i>      | 19  | Flow of participants, using a diagram                                                                                                                  | 10                 |
|                          | 20  | Baseline demographic and clinical characteristics of participants                                                                                      |                    |
|                          | 21a | Distribution of severity of disease in those with the target condition                                                                                 |                    |
|                          | 21b | Distribution of alternative diagnoses in those without the target condition                                                                            |                    |
|                          | 22  | Time interval and any clinical interventions between index test and reference standard                                                                 |                    |
| <i>Test results</i>      | 23  | Cross tabulation of the index test results (or their distribution) by the results of the reference standard                                            | 10                 |
|                          | 24  | Estimates of diagnostic accuracy and their precision (such as 95% confidence intervals)                                                                |                    |
|                          | 25  | Any adverse events from performing the index test or the reference standard                                                                            |                    |
| <b>DISCUSSION</b>        |     |                                                                                                                                                        |                    |
|                          | 26  | Study limitations, including sources of potential bias, statistical uncertainty, and generalisability                                                  | 12                 |
|                          | 27  | Implications for practice, including the intended use and clinical role of the index test                                                              |                    |
| <b>OTHER INFORMATION</b> |     |                                                                                                                                                        |                    |
|                          | 28  | Registration number and name of registry                                                                                                               |                    |
|                          | 29  | Where the full study protocol can be accessed                                                                                                          |                    |
|                          | 30  | Sources of funding and other support; role of funders                                                                                                  |                    |

## STARD 2015

---

### AIM

STARD stands for “Standards for Reporting Diagnostic accuracy studies”. This list of items was developed to contribute to the completeness and transparency of reporting of diagnostic accuracy studies. Authors can use the list to write informative study reports. Editors and peer-reviewers can use it to evaluate whether the information has been included in manuscripts submitted for publication.

---

### EXPLANATION

A **diagnostic accuracy study** evaluates the ability of one or more medical tests to correctly classify study participants as having a **target condition**. This can be a disease, a disease stage, response or benefit from therapy, or an event or condition in the future. A medical test can be an imaging procedure, a laboratory test, elements from history and physical examination, a combination of these, or any other method for collecting information about the current health status of a patient.

The test whose accuracy is evaluated is called **index test**. A study can evaluate the accuracy of one or more index tests. Evaluating the ability of a medical test to correctly classify patients is typically done by comparing the distribution of the index test results with those of the **reference standard**. The reference standard is the best available method for establishing the presence or absence of the target condition. An accuracy study can rely on one or more reference standards.

If test results are categorized as either positive or negative, the cross tabulation of the index test results against those of the reference standard can be used to estimate the **sensitivity** of the index test (the proportion of participants *with* the target condition who have a positive index test), and its **specificity** (the proportion *without* the target condition who have a negative index test). From this cross tabulation (sometimes referred to as the contingency or “2x2” table), several other accuracy statistics can be estimated, such as the positive and negative **predictive values** of the test. Confidence intervals around estimates of accuracy can then be calculated to quantify the statistical **precision** of the measurements.

If the index test results can take more than two values, categorization of test results as positive or negative requires a **test positivity cut-off**. When multiple such cut-offs can be defined, authors can report a receiver operating characteristic (ROC) curve which graphically represents the combination of sensitivity and specificity for each possible test positivity cut-off. The **area under the ROC curve** informs in a single numerical value about the overall diagnostic accuracy of the index test.

The **intended use** of a medical test can be diagnosis, screening, staging, monitoring, surveillance, prediction or prognosis. The **clinical role** of a test explains its position relative to existing tests in the clinical pathway. A replacement test, for example, replaces an existing test. A triage test is used before an existing test; an add-on test is used after an existing test.

Besides diagnostic accuracy, several other outcomes and statistics may be relevant in the evaluation of medical tests. Medical tests can also be used to classify patients for purposes other than diagnosis, such as staging or prognosis. The STARD list was not explicitly developed for these other outcomes, statistics, and study types, although most STARD items would still apply.

---

### DEVELOPMENT

This STARD list was released in 2015. The 30 items were identified by an international expert group of methodologists, researchers, and editors. The guiding principle in the development of STARD was to select items that, when reported, would help readers to judge the potential for bias in the study, to appraise the applicability of the study findings and the validity of conclusions and recommendations. The list represents an update of the first version, which was published in 2003.

More information can be found on <http://www.equator-network.org/reporting-guidelines/stard>.

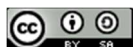

Supplement: bmjopen-2017-017216.draft_revisions.pdf [file bmjopen-2017-017216.draft_revisions.pdf]
